# 1 **Robust estimation of cancer and immune cell-type proportions from** 2 **bulk tumor ATAC-Seq data.**

3 Aurélie AG Gabriel<sup>1,2,3,4</sup>, Julien Racle<sup>1,2,3,4</sup>, Maryline Falquet<sup>3,5,6,7</sup>, Camilla Jandus<sup>3,5,6,7</sup>, David  
4 Gfeller<sup>1,2,3,4,\*</sup>

5 Affiliations:

6 <sup>1</sup> Department of Oncology, Ludwig Institute for Cancer Research, University of Lausanne, Lausanne,  
7 Switzerland

8 <sup>2</sup> Agora Cancer Research Centre, Lausanne, Switzerland

9 <sup>3</sup> Swiss Cancer Center Lemman (SCCL), Switzerland

10 <sup>4</sup> Swiss Institute of Bioinformatics (SIB), Lausanne, Switzerland.

11 <sup>5</sup> Ludwig Institute for Cancer Research, Lausanne Branch, Lausanne, Switzerland

12 <sup>6</sup> Department of Pathology and Immunology Faculty of Medicine, University of Geneva, Geneva,  
13 Switzerland

14 <sup>7</sup> Geneva Center for Inflammation Research, Geneva, Switzerland

15 \* Corresponding author: [david.gfeller@unil.ch](mailto:david.gfeller@unil.ch)

16

## 17 **Abstract**

18 Assay for Transposase-Accessible Chromatin sequencing (ATAC-Seq) is a widely used technique to  
19 explore gene regulatory mechanisms. For most ATAC-Seq data from healthy and diseased tissues  
20 such as tumors, chromatin accessibility measurement represents a mixed signal from multiple cell  
21 types. In this work, we derive reliable chromatin accessibility marker peaks and reference profiles for  
22 all major cancer-relevant cell types. We then capitalize on the EPIC deconvolution framework (Racle  
23 et al. 2017) previously shown to accurately predict cell-type composition in tumor bulk RNA-Seq data  
24 and integrate our markers and reference profiles to EPIC to quantify cell-type heterogeneity in bulk

25 ATAC-Seq data. Our EPIC-ATAC tool accurately predicts non-malignant and malignant cell fractions in  
26 tumor samples. When applied to a breast cancer cohort, EPIC-ATAC accurately infers the immune  
27 contexture of the main breast cancer subtypes.

28

## 29 **Introduction**

30 Gene regulation is a dynamic process largely determined by the physical access of chromatin-binding  
31 factors such as transcription factors (TFs) to regulatory regions of the DNA (*e.g.*, enhancers and  
32 promoters) (Klemm, Shipony, and Greenleaf 2019). The genome-wide landscape of chromatin  
33 accessibility is essential in the control of cellular identity and cell fate and thus varies in different cell  
34 types (K. Zhang et al. 2021; Klemm, Shipony, and Greenleaf 2019). Over the last decade, Assay for  
35 Transposase-Accessible Chromatin (ATAC-Seq) (Buenrostro et al. 2013) has become a reference  
36 epigenomic technique to profile chromatin accessibility and the activity of gene regulatory elements  
37 in diverse biological contexts including cancer (Luo, Gribskov, and Wang 2022) and across large  
38 cohorts (Corces et al. 2018). Several optimized ATAC-seq protocols have been developed to improve  
39 the quality of ATAC-Seq data and expand its usage to different tissue types. These include the OMNI-  
40 ATAC protocol, which leads to cleaner signal and is applicable to frozen samples (Corces et al. 2017;  
41 Grandi et al. 2022), as well as the formalin-fixed paraffin-embedded (FFPE)-ATAC protocol adapted to  
42 FFPE samples. The reasonable cost and technical advantages of these protocols foreshadow an  
43 increased usage of ATAC-Seq in cancer studies.

44

45 Most biological tissues are composed of multiple cell types. For instance, tumors are complex  
46 ecosystems including malignant and stromal cells as well as a large diversity of immune cells. This  
47 cellular heterogeneity, in particular the presence of specific immune cell types, impacts tumor  
48 progression as well as response to immunotherapy (Fridman et al. 2012; 2017; de Visser and Joyce  
49 2023). Most existing ATAC-Seq data from tumors were performed on bulk samples, thereby including  
50 information from both cancer and non-malignant cells. Precisely quantifying the proportions of

51 different cell types in such samples represents therefore a promising way to explore the immune  
52 contexture and the composition of the tumor micro-environment (TME) across large cohorts.  
53 Carefully assessing cell-type heterogeneity is also important to handle confounding factors in  
54 genomic analyses in which samples with different cellular compositions are compared. Recently,  
55 single-cell ATAC-Seq (scATAC-Seq) has been developed to explore cellular heterogeneity with high  
56 resolution in complex biological systems (Cusanovich et al. 2015; Lareau et al. 2019; Satpathy et al.  
57 2019). However, the resulting data are sensitive to technical noise and such experiments require  
58 important resources, which so far limits the use of scATAC-Seq in contrast to bulk sequencing in the  
59 context of large cohorts.

60

61 In the past decade, computational deconvolution tools have been developed to predict the  
62 proportion of diverse cell types from bulk genomic data obtained from tumor samples (Avila Cobos  
63 et al. 2018; 2020; Sturm et al. 2019; Racle et al. 2017; Monaco et al. 2019; Newman et al. 2019; H. Li  
64 et al. 2020; Finotello et al. 2019; Becht et al. 2016). A large number of these tools model bulk data as  
65 a mixture of reference profiles identified in purified cell populations for each cell type. The accuracy  
66 of the predictions of cell-type proportions relies on the quality of these reference profiles as well as  
67 on the use of cell-type specific markers (Avila Cobos et al. 2018). A limitation of most deconvolution  
68 algorithms is that they do not predict the proportion of cell types that are not present in the  
69 reference profiles (here referred to as 'uncharacterized' cells). In the context of cancer samples,  
70 these uncharacterized cell populations include malignant cells whose molecular profiles differ not  
71 only from one cancer type to another, but also from one patient to another even within the same  
72 tumor type (Corces et al. 2018). A few tools consider uncharacterized cells in their deconvolution  
73 framework by using cell-type specific markers not expressed in the uncharacterized cells (Clarke,  
74 Seol, and Clarke 2010; Gosink, Petrie, and Tsinoremas 2007; Racle et al. 2017; Finotello et al. 2019).  
75 These tools include EPIC (Estimating the Proportion of Immune and Cancer cells) which

76 simultaneously quantifies immune, stromal, vascular as well as uncharacterized cells from bulk tumor  
77 samples (Racle et al. 2017; Racle and Gfeller 2020).

78

79 Most deconvolution algorithms have been initially developed for transcriptomic data (RNA-Seq data)  
80 (Newman et al. 2015; Racle et al. 2017; Finotello et al. 2019; Monaco et al. 2019; Newman et al.  
81 2019; T. Li et al. 2020; Jimenez-Sanchez, Cast, and Miller 2019; Gong and Szustakowski 2013). More  
82 recently they have been adapted for other omics layers such as methylation (Chakravarthy et al.  
83 2018; Teschendorff et al. 2020; Arneson, Yang, and Wang 2020; H. Zhang et al. 2021) and proteomics  
84 (Feng et al. 2023) or chromatin accessibility. For the latter, a specific framework called DeconPeaker  
85 (H. Li et al. 2020) was developed to estimate cell-type proportions from bulk samples. Deconvolution  
86 tools developed initially for other omics modalities, such as RNA-Seq, can also be applied on ATAC-  
87 Seq if appropriate ATAC-Seq profiles are provided to the tool. For example, the popular  
88 deconvolution tool, CIBERSORT (Newman et al. 2015), was used to deconvolve leukemic ATAC-Seq  
89 samples (Corces et al. 2016). Other methods have been proposed to decompose ATAC-Seq bulk  
90 profiles into subpopulation-specific profiles (Zeng et al. 2019; Burdziak et al. 2019) or compartments  
91 (Peng et al. 2019). However, these methods have more requisites: (i) the integration of the ATAC-Seq  
92 data with single-cell or bulk RNA-Seq (Zeng et al. 2019; Burdziak et al. 2019) and HiChIP data (Zeng et  
93 al. 2019) or, (ii) subsequent feature annotation to associate compartments with cell types or  
94 biological processes (Peng et al. 2019).

95 The application of existing bulk ATAC-Seq data deconvolution tools to solid tumors is limited. First,  
96 current computational frameworks do not quantify populations of uncharacterized cell types.  
97 Second, ATAC-Seq based markers (*i.e.*, chromatin accessible regions called peaks) and reference  
98 profiles generated so far have been derived in the context of hematopoietic cell mixtures (Corces et  
99 al. 2016; H. Li et al. 2020). Markers and profiles for major populations of the TME (*e.g.*, stromal and  
100 vascular cells) are thus missing. While cell-type specific markers have been identified from scATAC-  
101 Seq data (K. Zhang et al. 2021), not all TME-relevant cell types are covered (*e.g.*, lack of scATAC-Seq

102 data from neutrophils due to extracellular traps formation). Also, these markers have not been  
103 curated to fulfill the requirements of tools such as EPIC to quantify uncharacterized cells (*i.e.*,  
104 markers of a cell-type should not be accessible in other human tissues).

105

106 In this study, we collected ATAC-Seq data from pure cell types to identify cell-type specific  
107 marker peaks and to build reference profiles from most major non-malignant cell types typically  
108 observed in tumors. These data were integrated in the EPIC (Racle et al. 2017) framework to perform  
109 bulk ATAC-Seq samples deconvolution (Figure 1). Applied on peripheral blood mononuclear cells  
110 (PBMCs) and tumor samples, the EPIC-ATAC framework showed accurate predictions of the  
111 proportions of non-malignant and malignant cells with similar or higher performances than other  
112 existing tools.

113

114

## 115 **Results**

### 116 **ATAC-Seq data from sorted cell populations reveal cell-type specific marker peaks and** 117 **reference profiles**

118 A key determinant for accurate predictions of cell-type proportions by most deconvolution tools is  
119 the availability of reliable cell-type specific markers and reference profiles. To identify robust  
120 chromatin accessibility marker peaks of cancer relevant cell types, we collected 564 samples of  
121 sorted cell populations from twelve studies including eight immune cell types (B cells (Calderon et al.  
122 2019; Corces et al. 2016; P. Zhang et al. 2022), CD4+ T cells (Corces et al. 2016; Liu et al. 2020; P.  
123 Zhang et al. 2022; Mumbach et al. 2017; Giles et al. 2022), CD8+ T cells (Calderon et al. 2019; Corces  
124 et al. 2016; Liu et al. 2020; P. Zhang et al. 2022; Giles et al. 2022), natural killer (NK) cells (Calderon et  
125 al. 2019; Corces et al. 2016), dendritic cells (DCs) (Calderon et al. 2019; Leylek et al. 2020; Liu et al.  
126 2020), macrophages (Liu et al. 2020; P. Zhang et al. 2022), monocytes (Calderon et al. 2019; Corces et  
127 al. 2016; Leylek et al. 2020; P. Zhang et al. 2022; Trizzino et al. 2021) and neutrophils (Ram-Mohan et

128 al. 2021; Perez et al. 2020), as well as fibroblasts (Ge et al. 2021; Liu et al. 2020) and endothelial (Liu  
129 et al. 2020; Xin et al. 2020) cells (Figure 1 box 1, Figure 2A, Supplementary Table 1). To limit batch  
130 effects, the collected samples were homogeneously processed from read alignment to peak calling.  
131 For each cell type, we derived a set of stable peaks, *i.e.*, peaks observed across samples and studies  
132 (see Materials and Methods).  
133 These peaks were then used to perform pairwise differential analysis to identify marker peaks for  
134 each cell type (Figure 1, box 2). To ensure that the cell-type specific marker peaks are not accessible  
135 in other human tissues, we included in the differential analysis ATAC-Seq samples from diverse  
136 human tissues from the ENCODE data (The ENCODE Project Consortium et al. 2020; Rozowsky et al.  
137 2023) (Supplementary Figure 1). To select a sufficient number of peaks prior to peak filtering, the top  
138 200 peaks recurrently differentially accessible across all cell-type pairs were selected as cell-type  
139 specific markers (see Materials and Methods). Using the human atlas study (K. Zhang et al. 2021),  
140 markers with potential residual accessibility in human tissues were then filtered out (Figure 1, box 3,  
141 see Materials and Methods). The resulting marker peaks specific to the immune cell types were  
142 considered for the deconvolution of PBMC samples (PBMC markers). For tumor bulk sample  
143 deconvolution, the list of markers was further refined based on the correlation patterns of the  
144 markers in tumor bulk samples from diverse cancer types from The Cancer Genome Atlas (TCGA)  
145 (Corces et al. 2018) (Figure 1, box 4, see the Material and methods). The latter filtering ensures the  
146 relevance of the markers in the TME context since cell-type specific TME markers are expected to be  
147 correlated in tumor bulk ATAC-Seq measurements (Qiu et al. 2021). 716 markers of immune,  
148 fibroblasts and endothelial cell types remained after the later filtering and were considered for the  
149 deconvolution of bulk tumor samples (TME markers).  
150 To assess the quality and reproducibility of these markers, we performed principal component  
151 analysis (PCA) based on each set of marker peaks. Computing silhouette coefficients based on the  
152 cell-type classification and on the study of origin showed that samples clustered by cell type and not  
153 by study of origin (averaged silhouette coefficients above 0.45 for cell type and around 0 for study of

154 origin). Two-dimensional UMAP representations of the samples confirmed this observation (Figure  
155 2B). These results indicate limited remaining batch effects after data processing and marker  
156 selection.

157 We then used the collected samples to generate chromatin accessibility profiles by computing the  
158 average of the normalized counts for each peak in each cell type as well as peak variability in each  
159 cell type (Racle et al. 2017) (see Material and methods). Figure 2C represents the average chromatin  
160 accessibility of each marker peak in each cell type of the reference dataset and highlights, as  
161 expected, the cell-type specificity of the selected markers (see also Supplementary Tables 2 and 3),  
162 which was confirmed in independent ATAC-Seq data from sorted cells and single-cell ATAC-Seq  
163 samples from blood and diverse human tissues (Figure 2D and 2E, see Materials and methods).

164

#### 165 **Annotations of the marker peaks highlight their biological relevance**

166 To characterize the different marker peaks, we annotated them using ChIPSeeker (Yu, Wang, and He  
167 2015). We observed that most of the markers are in distal and intergenic regions (Figure 2F), which is  
168 expected considering the large proportion of distal regions in the human genome and the fact that  
169 such regions have been previously described as highly cell-type specific (Corces et al. 2016). We also  
170 noticed that 7% of the PBMC and TME marker peaks are in promoter regions in contrast to 4% when  
171 considering matched genomic regions randomly selected in the set of peaks identified prior to the  
172 differential analysis (see Material and methods), which suggest enrichment in our marker peaks for  
173 important regulatory regions.

174 To assess the biological relevance of the marker peaks, we associated each marker peak to its  
175 nearest gene using ChIP-Enrich based on the “nearest transcription start site (TSS)” locus definition  
176 (Welch et al. 2014) (Supplementary Tables 4 and 5). Nearest genes reported as known marker genes  
177 in public databases of gene markers (*i.e.*, PanglaoDB (Franzén, Gan, and Björkegren 2019) and  
178 CellMarker (Hu et al. 2023)) are listed in Table 1.

179 In each set of cell-type specific peaks, we observed an overrepresentation of chromatin binding  
 180 proteins (CBPs) reported in the JASPAR2022 database (Castro-Mondragon et al. 2022) (using Signac  
 181 (Stuart et al. 2021) and MonaLisa (Machlab et al. 2022) for assessing the overrepresentation) and the  
 182 ReMap catalog (Hammal et al. 2022) (using RemapEnrich, see Material and Methods).  
 183 Overrepresented CBPs also reported as known marker genes in the PanglaoDB and CellMarker  
 184 databases are listed in Table 1. Detailed peaks annotations are summarized in Supplementary Tables  
 185 4 and 5.  
 186 Based on the “nearest TSS” annotation, we tested, using ChIP-Enrich (Welch et al. 2014), whether  
 187 each set of cell-type specific marker peaks was enriched for regions linked to specific biological  
 188 pathways (GO pathways). Figure 2G highlights a subset of the enriched pathways that are consistent  
 189 with prior knowledge on each cell type. Some of these pathways are known to be characteristic of  
 190 immune responses to inflammatory or tumoral environments. The complete list of enriched  
 191 pathways is listed in the Supplementary Tables 6 and 7. Overall, these analyses demonstrate that the  
 192 proposed cell-type specific marker peaks capture some of the known biological properties associated  
 193 to each cell type.

| Cell type          | Nearest genes                                                                                                                                                                                                                                                                                                                                                                | Enriched CPBs                                                                                                                                     |
|--------------------|------------------------------------------------------------------------------------------------------------------------------------------------------------------------------------------------------------------------------------------------------------------------------------------------------------------------------------------------------------------------------|---------------------------------------------------------------------------------------------------------------------------------------------------|
| <b>Bcells</b>      | DHTKD1 LHPP WDFY4 ARID5B HHEX SIDT2 CD82 MS4A1 FCHSD2<br>USP8 RHCG ATF7IP2 CIITA GGA2 SNX29P2 C16orf74 CBFA2T3<br>CD79B BCL2 GNG7 CD22 FCER2 FCRL1 LY9 PTPRC LAPTM5 IGLL5<br>VPREB3 CENPM AFF3 SP100 INPP5D DTNB CD86 RFTN1 ST6GAL1<br>NGLY1 OSBPL10 TLR9 CD38 SMIM14 ARHGAP24 ADAM19 EBF1<br>BASP1 CD83 PLEKHG1 CCR6 CCND3 HDAC9 CDCA7L BLK MTSS1<br>LYN PLEKHF2 MOB3B PAX5 | SPIB POU2F2 TCF4 EBF1<br>TCF3 NFKB1 STAT1<br>NFKB2 IKZF1 FOXO1<br>FOXP1 BCL6 POU2AF1<br>STAT3 BACH2 IKZF3 FLI1<br>TBX21 JUNB MITF NKX6-<br>2 RBPJ |
| <b>CD4_Tcells</b>  | IL2RA CD6 CD5 CD4 RORA PTPRC CTLA4 ICOS SLC9A9 FHIT TCF7<br>FYB1 ATXN1 CD40LG                                                                                                                                                                                                                                                                                                | TCF7 RUNX3 SOHLH2<br>IRF9 GATA3 TBX21 MAF<br>STAT3 RORA BATF CREM                                                                                 |
| <b>CD8_Tcells</b>  | MKI67 JAML MAML2 KLRD1 NELL2 LAG3 PPP1R13B PTPRC LYST<br>CASP8 CD8A CD8B CD96 BTLA GZMA THEMIS ETV1                                                                                                                                                                                                                                                                          | ETV1 FOXP3 TBX21<br>FOXP1 EOMES CREM<br>IRF4 ZEB1 ARNT JUNB<br>TCF7                                                                               |
| <b>NK</b>          | PRF1 ZBTB16 KLRD1 SPN CD226 SH2D1B CD247 IL2RB CXCR4<br>NMUR1 GNLY ZAP70 TXK                                                                                                                                                                                                                                                                                                 | EOMES TBX21 NFIL3 FOS<br>JUN                                                                                                                      |
| <b>DCs</b>         | C12orf75 LYZ APP CD8A RIOX2 NFKB1 QDPR ABCG2 PRELID2<br>DST CD36 IDO2 PCMTD1                                                                                                                                                                                                                                                                                                 | SPIB IRF8 MYB NR4A1<br>REL CUX2 FOXO1 ETV6<br>IRF5 BATF3 RUNX2                                                                                    |
| <b>Neutrophils</b> | TLE3 CA4 CYP4F3 CEACAM8 PGLYRP1 FPR1 CTSS ALPL PI3 MMP9<br>CXCR1 DRC1 ASPRV1 LTF MGAM SLC25A37                                                                                                                                                                                                                                                                               | FOS                                                                                                                                               |



|                    |                                                                                                                                                                                  |                                                               |
|--------------------|----------------------------------------------------------------------------------------------------------------------------------------------------------------------------------|---------------------------------------------------------------|
| <b>Monocytes</b>   | VENTX GLT1D1 CLEC4E CARS2 SLC24A4 C16orf74 FFAR2 STXBP2 NLRP3 CYRIA CMTM7 TGFBI DIAPH1 VCAN MCTP1 IFNGR1 STX11 CAPZA2 CD36 MTSS1 DENND3 ASAH1 TNFRSF10B BNIP3L NACC2 MAMDC2 FBP1 | CEBPA CEBPD CEBPB CEBPE SPI1 VENTX JUND RXRA TCF7L2           |
| <b>Macrophages</b> | CXCL12 PSAP P2RY6 SLC02B1 CMKLR1 MMP19 LGMN CLEC10A C5AR1 FPR3 LILRB4 RGL1 SIGLEC1 MMP9 CD80                                                                                     | STAT1 SPI1 FOSL2 FOS SPIC                                     |
| <b>Endothelial</b> | FAM107B ROBO4 FLI1 ACVRL1 FLT1 DOCK9 ABCC1 S1PR1 ELOVL1 PLPP3 ASAP2 SNRK ECSCR ARAP3 LAMA4 BMP6 SERPINE1 LAMB1 DOCK4 NOS3                                                        | ETV2 ELF1 FLI1 ELK3 FOSB ETS1 ERG GATA2 ZEB1 ETS2 FOXC1 SOX18 |
| <b>Fibroblasts</b> | LOX CAV1 COL15A1                                                                                                                                                                 | FOSL2 FOSB FLI1 HIF1A PBX1                                    |

194

195 **Table 1:** List of nearest genes and enriched CBPs reported in the PanglaoDB or CellMarker databases.

196

### 197 EPIC-ATAC accurately estimates immune cell fractions in PBMC ATAC-Seq samples

198 The cell-type specific marker peaks and profiles derived from the reference samples were integrated  
 199 to the EPIC deconvolution tool (Racle et al. 2017; Racle and Gfeller 2020). We will refer to this ATAC-  
 200 Seq deconvolution framework as EPIC-ATAC.

201 To test the accuracy of EPIC-ATAC predictions, we first collected PBMCs from five healthy donors. In  
 202 each donor, half of the cells was used to generate a bulk ATAC-Seq dataset and the other half was  
 203 used to determine the cellular composition of each sample, *i.e.*, the proportions of monocytes, B  
 204 cells, CD4+ T cells, CD8+ T cells, NK cells and dendritic cells, by multiparametric flow cytometry  
 205 (Figure 3A, see Materials and methods). We then applied EPIC-ATAC to the bulk ATAC-Seq data. The  
 206 predicted cell fractions are consistent with the cell fractions obtained by flow cytometry (Figure 3B,  
 207 Pearson correlation coefficient of 0.78 and root mean squared error (RMSE) of 0.10).

208 As a second validation, we applied EPIC-ATAC to pseudo-bulk PBMC samples (referred to as the  
 209 PBMC pseudobulk dataset, generated using three publicly available PBMC scATAC-Seq datasets  
 210 (Satpathy et al. 2019; Granja et al. 2019; 10x Genomics 2021), see Material and methods). A high  
 211 correlation (0.91) between EPIC-ATAC predictions and true cell-type proportions and a low RMSE  
 212 (0.05) were observed for this dataset (Figure 3C).

213 The accuracy of the predictions obtained with EPIC-ATAC was then compared with the accuracy of  
 214 other deconvolution approaches which could be used with our reference profiles and marker peaks

215 (Figure 3D-E). To this end, we considered both the DeconPeaker method (H. Li et al. 2020) originally  
216 developed for bulk ATAC-Seq as well as several algorithms developed for bulk RNA-Seq (CIBERSORTx  
217 (Newman et al. 2019), QuanTIseq (Finotello et al. 2019), ABIS (Monaco et al. 2019), and MCPcounter  
218 (Becht et al. 2016)). To enable meaningful comparison across the cell types considered in this work  
219 and use the method initially developed for bulk RNA-Seq deconvolution, the marker peaks and  
220 profiles derived in this work were used in each of these methods. DeconPeaker and CIBERSORTx  
221 include the option to define cell-type specific markers and profiles from a set of reference samples.  
222 We thus fed our ATAC-Seq samples collection to both algorithms and used the resulting profiles and  
223 marker peaks to perform bulk ATAC-Seq deconvolution. The resulting predictions are referred to as  
224 DeconPeaker-Custom and CIBERSORTx-Custom.

225 Many tools displayed high correlation and low RMSE values, similar to those of EPIC-ATAC, and no  
226 single tool consistently outperformed the others (Figure 3D-E, Supplementary Figure 2A-C). The fact  
227 that our marker peaks and reference profiles could be used with EPIC-ATAC and other existing tools  
228 demonstrates their broad applicability.

229 Predictions accuracies were also evaluated in each cell type separately. Since the number of samples  
230 was low in each dataset, samples from both datasets were combined for this analysis. EPIC-ATAC  
231 demonstrated good accuracies across cell types with RMSE values ranging from 0.02 for B cells to  
232 0.13 for NK cells (Supplementary Figure 3). As expected, predictions with all tools were more  
233 accurate for frequent cell types with well-characterized markers (*e.g.*, CD8/CD4 T cells, B cells)  
234 compared to less frequent cell types (*e.g.*, NK cells, dendritic cells) (Supplementary Figure 2 and 3).  
235 Note that MCPcounter is a marker-based method that derives cell-type specific scores which cannot  
236 be compared between cell types. This method was thus only included in the benchmark considering  
237 each cell type separately.

238

239 **EPIC-ATAC accurately predicts fractions of cancer and non-malignant cells in tumor**  
240 **samples**

241 We evaluated the ability of the EPIC-ATAC framework to predict not only immune and stromal cells  
242 proportions but also the proportion of cells for which reference profiles are not available (*i.e.*,  
243 uncharacterized cells). For this purpose, we considered two previously published scATAC-Seq  
244 datasets containing basal cell carcinoma and gynecological cancer samples (Satpathy et al. 2019;  
245 Regner et al. 2021). We generated two pseudobulk datasets by averaging the chromatin accessibility  
246 signal across all cells of each sample (see Material and methods). Applying EPIC-ATAC to both  
247 datasets shows that this framework is able to simultaneously predict the proportions of both  
248 uncharacterized cells and immune, stromal and vascular cells (Figure 4A). In these cancer samples,  
249 the proportion of uncharacterized cells can be seen as a proxy of the proportion of cancer cells.

250 As for the PBMC datasets, we compared EPIC-ATAC performances to other existing deconvolution  
251 tools. For both datasets, EPIC-ATAC led to the highest performances and was the only method to  
252 accurately predict the proportion of uncharacterized cells (Figure 4B, Supplementary Figure 4 and 5).  
253 Although quanTIseq also allows users to perform such predictions, the method resulted in lower  
254 correlation and higher RMSE values when comparing the estimated and true proportions of the  
255 uncharacterized cells (Figure 4B, Supplementary Figure 4).

256 In the EPIC-ATAC and quanTIseq frameworks, predictions correspond to absolute cell-type fraction,  
257 *i.e.*, proportions of all cells present in the bulk, while the estimations obtained from the other tools  
258 correspond to relative cell fractions, *i.e.*, proportions of cells present in the reference profiles  
259 (CIBERSORTx, DeconPeaker) or to scores with arbitrary units (ABIS, MCPcounter). We thus conducted  
260 a second benchmark excluding the predictions of uncharacterized cell fractions and rescaling both  
261 estimations and true proportions to sum to 1 (see Material and methods). EPIC-ATAC outperformed  
262 most of the other methods also when excluding the uncharacterized cells (Figure 4C, Supplementary  
263 Figure 4 and 5).

264 Supplementary Figure 6 reports the performances of each tool when considering each cell type  
265 separately. Overall, EPIC-ATAC showed comparable or higher correlation and lower RMSE values  
266 when compared to the other deconvolution tools.

267

268 **T cell subtypes quantification reveals the ATAC-Seq deconvolution limits for closely related**  
269 **cell types.**

270 To explore the limitations of ATAC-Seq deconvolution, we next evaluated whether EPIC-ATAC could  
271 predict the proportions of T-cell subtypes. To this end, we considered naive and non-naive CD8+ as  
272 well as naïve, helper/memory and T regulatory CD4+ T cells. We redefined our list of cell-type specific  
273 marker peaks and reference profiles including also these five T-cell subtypes (Supplementary Tables  
274 8-9, Supplementary Figure 7A) and observed that the markers were conserved in external data  
275 (Supplementary Figure 7B). The annotations of the markers associated to the T-cell subtypes are  
276 available in Supplementary Tables 10-13.

277 We capitalized on the more detailed cell-type annotation of the PBMC datasets as well as the basal  
278 cell carcinoma dataset to evaluate the EPIC-ATAC prediction of cell-subtype fractions using these  
279 updated markers and profiles. Overall, the correlations observed between the predictions and true  
280 proportions of T cells decreased when considering T-cell subtypes rather than CD4+ and CD8+ cell  
281 types only (Figure 5A). In particular, low accuracies were obtained for helper/memory CD4+ and  
282 naïve T-cell subtypes (Figure 5B). Similar results were obtained using other deconvolution tools  
283 (Supplementary Figure 8).

284

285 **EPIC-ATAC accurately infers the immune contexture in a bulk ATAC-Seq breast cancer**  
286 **cohort**

287 We applied EPIC-ATAC to a breast cancer cohort of 42 breast ATAC-Seq samples including samples  
288 from two breast cancer subtypes, *i.e.*, 35 oestrogen receptor (ER)-positive human epidermal growth  
289 factor receptor 2 (HER2)-negative (ER+/HER2-) samples and 7 triple negative (TN) tumors (Kumegawa  
290 et al. 2023). No cell sorting was performed in parallel to the chromatin accessibility sequencing. We  
291 thus used EPIC-ATAC to estimate cell-type proportions. We observed a higher proportion of T cells, B  
292 cells, NK cells and macrophages in the TN samples in comparison to ER+/HER2- samples (Figure 6A).

293 We then compared the cellular composition of ER+/HER2- subgroups identified in the original study  
294 (clusters CA-A, CA-B and CA-C). A higher infiltration of T and B cells was observed in cluster CA-C and  
295 higher proportions of endothelial cells and fibroblasts were observed in cluster CA-B (Figure 6B).  
296 These predictions are consistent with the infiltration level estimations reported in the original  
297 publication, although no differences in macrophages infiltration was observed between the  
298 ER+/HER2- subgroups in our case (Kumegawa et al. 2023).

299

### 300 **EPIC-ATAC performs similarly to EPIC RNA-seq based deconvolution and better than gene** 301 **activity based deconvolution**

302 We finally compared the accuracy of EPIC when applied on ATAC-Seq data and on RNA-Seq data. For  
303 this purpose, we used the 10X multiome PBMC dataset (10x Genomics 2021) which provides for each  
304 cell both its chromatin accessibility profile and its gene expression profile and simulated 100  
305 pseudobulks with diverse cellular compositions (see Material and methods). We used EPIC-ATAC to  
306 perform ATAC-Seq based deconvolution on the chromatin accessibility levels of the peaks and the  
307 original EPIC tool to perform standard RNA-seq deconvolution on the gene expression levels. ATAC-  
308 Seq peaks can also be aggregated, based on peak distances to each gene, into gene activity (GA)  
309 variables as proxy for gene expression. We thus applied the GA transformation to the 10x multiome  
310 PBMC dataset and performed GA-based RNA deconvolution using the original EPIC tool (See Material  
311 and methods).

312 Figure 7 shows that EPIC-ATAC performs similarly to the EPIC RNA-seq based deconvolution and  
313 outperforms the GA-based RNA deconvolution. The lower performances of GA based RNA  
314 deconvolution could be explained by the fact that GA features, by construction, do not perfectly  
315 match the transcriptomic data.

316

## 317 **Discussion**

318 Bulk chromatin accessibility profiling of biological tissues like tumors represents a reliable and  
319 affordable technology to map the activity of gene regulatory elements across multiple samples in  
320 different conditions. Here, we collected ATAC-Seq data from pure cell populations covering major  
321 immune and non-immune cancer-relevant cell types from diseased, stimulated and healthy samples.  
322 This enabled us to identify reliable cell-type specific marker peaks and chromatin accessibility profiles  
323 for both PBMC and solid tumor sample deconvolution. We integrated these data in the EPIC  
324 deconvolution framework to accurately predict the fraction of both malignant and non-malignant cell  
325 types from bulk tumor ATAC-Seq samples.

326 In cases where specific cell types are expected in a sample but are not part of our list of reference  
327 profiles (*e.g.*, neuronal cells in brain tumors), custom marker peaks and reference profiles can be  
328 provided to EPIC-ATAC to perform cell-type deconvolution and we provide the code to generate such  
329 markers and profiles based on ATAC-Seq data from sorted cells, following the approach developed in  
330 this work (Figure 1, see Code availability).

331 Solid tumors contain large and heterogeneous fractions of cancer cells for which it is  
332 challenging to build reference profiles. To our knowledge this work provides the first benchmark of  
333 deconvolution tools adapted to ATAC-Seq data in the context of solid tumor samples. We show that  
334 the EPIC-ATAC framework, in contrast to other existing tools, allows users to accurately predict the  
335 proportion of cells not included in the reference profiles (Figure 4 and Supplementary Figure 4).  
336 These uncharacterized cells can include cancer cells but also other non-malignant cells. Since the  
337 major cell types composing TMEs were included in our reference profiles, the proportion of  
338 uncharacterized cells approximates the proportion of the cancer cells in most cases.

339 The pseudobulk approach provides unique opportunities to design benchmarks with known  
340 cell-type proportions but also comes with some limitations. Indeed, pseudobulks are generated from  
341 single-cell data which are noisy and whose cell-type annotation is challenging in particular for closely  
342 related cell types. These limitations might lead to chromatin accessibility profiles that deviates from  
343 true bulk data and errors in the true cell-type proportions. For this reason, we anticipate that the

344 newly generated benchmarking PBMCs dataset with ground truth cell proportions obtained by flow  
345 cytometry will nicely complement pseudobulk from scATAC-Seq data in future benchmarks of ATAC-  
346 Seq deconvolution. The qualitative evaluation of our method on true bulk ATAC-Seq samples from  
347 breast cancer patients and the observation of similar immune compositions in TN and ER+/HER2-  
348 samples as the ones identified in the original paper (Figure 6) further support the accuracy of EPIC-  
349 ATAC to deconvolve bulk ATAC-Seq data, without requiring additional scATAC-Seq data which are not  
350 always available for all cancer types.

351 Overall the evaluation of the EPIC-ATAC deconvolution resulted in an average absolute error  
352 of 7% across cell types. This number is consistent with previous observations in RNA-Seq data  
353 deconvolution (Racle et al. 2017). Considering this uncertainty, the quantification of low frequency  
354 populations remains challenging (Jin and Liu 2021). While the estimated proportions of these  
355 populations by EPIC-ATAC are low (*e.g.*, dendritic cells), comparing such estimations across samples  
356 should be performed with care due to the uncertainty of the predictions.

357 Another limitation of cell-type deconvolution is often reached when closely related cell types  
358 are considered. In the reference-based methods used in this study, this limit was reached when  
359 considering T-cell subtypes in the reference profiles (Figure 5 and Supplementary figure 8). We thus  
360 recommend to use the EPIC-ATAC framework using the markers and reference profiles based on the  
361 major cell populations. We additionally provide the marker peaks of the T-cell subtypes which could  
362 be used to build cell-type specific chromatin accessibility signatures or perform “peak set enrichment  
363 analysis” similarly to gene set enrichment analysis (GSEA, (Subramanian et al. 2005)). Such  
364 application could be useful for the annotation of scATAC-Seq data, which often relies on matched  
365 RNA-Seq data and for which there is a lack of markers at the peak level (Jiang et al. 2023).

366 Another possible application of our marker peaks relies on their annotation (Figure 2G,  
367 Supplementary Tables 4-5), which could be used to expand the list of genes and CBPs associated to  
368 each cell type or subtype. For example, the neutrophils marker peaks were enriched for motifs of TFs  
369 such as SPI1 (Supplementary Table 4), which was not listed in the neutrophil genes in the databases

370 used for annotation but has been reported in previous studies as involved in neutrophils  
371 development (Watt et al. 2021). The annotations related to the set of major cell types and T-cell  
372 subtypes are provided in Supplementary Tables 4-5 and 10-11. Finally, the annotation of marker  
373 peaks highlighted pathways involved in immune responses to tumoral environments (Figure 2G).  
374 Examples of these pathways are the toll-like receptor signaling pathway involved in pathogen-  
375 associated and recognition of damage-associated molecular patterns in diverse cell types including B  
376 and T cells (Geng et al. 2010; Javaid and Choi 2020), glucan metabolic processes which are known to  
377 be related to trained immunity which can lead to anti-tumor phenotype in neutrophils (Kalafati et al.  
378 2020) or the Fc-receptor signaling observed in NK cells (Sanseviero 2019; Bonnema et al. 1994).  
379 These observations suggest that our marker peaks contain regulatory regions not only specific to cell  
380 types but also adapted to the biological context of solid tumors.

381

## 382 **Conclusion**

383 In this work, we identified biologically relevant cell-type specific chromatin accessibility markers and  
384 profiles for all major cancer-relevant cell types. We capitalized on these markers and profiles to  
385 predict cell-type proportions from bulk PBMC and solid tumor ATAC-Seq data  
386 (<https://github.com/GfellerLab/EPIC-ATAC>). Evaluated on diverse tissues, EPIC-ATAC shows reliable  
387 predictions of immune, stromal, vascular and cancer cell proportions. With the expected increase of  
388 ATAC-Seq studies in cancer, the EPIC-ATAC framework will enable researchers to deconvolve bulk  
389 ATAC-Seq data from tumor samples to support the analysis of regulatory processes underlying tumor  
390 development, and correlate the TME composition with clinical variables.

391

## 392 **Materials and methods**

### 393 **Generation of an ATAC-Seq reference dataset of cancer relevant cell types.**

#### 394 **Pre-processing of the sorted ATAC-Seq datasets**



395 We collected pure ATAC-Seq samples from 12 studies. The data include samples from (i) ten major  
396 immune, stromal and vascular cell types (B (Calderon et al. 2019; Corces et al. 2016; P. Zhang et al.  
397 2022), CD4+ (Corces et al. 2016; Liu et al. 2020; P. Zhang et al. 2022; Mumbach et al. 2017; Giles et al.  
398 2022), CD8+ (Calderon et al. 2019; Corces et al. 2016; Liu et al. 2020; P. Zhang et al. 2022; Giles et al.  
399 2022), natural killer (NK) (Calderon et al. 2019; Corces et al. 2016), dendritic (DCs) cells (Calderon et  
400 al. 2019; Leylek et al. 2020; Liu et al. 2020), macrophages (Liu et al. 2020; P. Zhang et al. 2022),  
401 monocytes (Calderon et al. 2019; Corces et al. 2016; Leylek et al. 2020; P. Zhang et al. 2022; Trizzino  
402 et al. 2021) and neutrophils (Ram-Mohan et al. 2021; Perez et al. 2020) as well as fibroblasts (Ge et  
403 al. 2021; Liu et al. 2020) and endothelial (Liu et al. 2020; Xin et al. 2020) cells (See Figure 2A), and (ii)  
404 eight tissues from distinct organs (*i.e* bladder, breast, colon, liver, lung, ovary, pancreas and thyroid)  
405 from the ENCODE data (The ENCODE Project Consortium et al. 2020; Rozowsky et al. 2023). The list  
406 of the samples and their associated metadata (including cell types and accession number of the study  
407 of origin) is provided in Supplementary Table 1. To limit batch effects, the samples were reprocessed  
408 homogeneously from the raw data (fastq files) processing to the peak calling. For that purpose, raw  
409 fastq files were collected from GEO using the SRA toolkit and the PEPATAC framework (Smith et al.  
410 2021) was used to process the raw fastq files based on the following tool: trimmomatic for adapter  
411 trimming, bowtie2 (with the PEPATAC default parameters) for reads pre-alignment on human  
412 repeats and human mitochondrial reference genome, bowtie2 (with the default PEPATAC  
413 parameters: *--very-sensitive -X 2000*) for alignment on the human genome (hg38), samtools  
414 (PEPATAC default parameters: *-q 10*) for duplicates removal and MACS2 (Y. Zhang et al. 2008)  
415 (PEPATAC default parameters: *--shift -75 --extsize 150 --nomodel --call-summits --nolambda --keep-*  
416 *dup all -p 0.01*) for peak calling in each sample. After alignment, reads mapping on chromosome M  
417 were excluded. TSS enrichment scores were computed for each sample and used to filter out  
418 samples with low quality (criteria of exclusion: TSS score < 5) (See Supplementary Table 1 containing  
419 the TSS score of each sample). 789 samples (including 564 from our ten reference cell-types) had a  
420 TSS score > 5.

421

## 422 **Generation of a consensus set of peaks**

423 Peak calling was performed in each sample individually. Peaks were then iteratively collapsed to  
424 generate a set of reproducible peaks. For each cell type, peaks collapse was performed adapting the  
425 iterative overlap peak merging approach proposed in the PEPATAC framework. A first peaks collapse  
426 was performed at the level of each study of origin, *i.e.*, if peaks identified in distinct samples  
427 overlapped (minimum overlap of 1bp between peaks), only the peak with the highest peak calling  
428 score was kept. Also, only peaks detected in at least half of the samples of each study were  
429 considered for the next step. If a study had only two samples, only peaks detected in both samples  
430 were considered. After this first selection, a second round of peaks collapse was performed at the  
431 cell-type level to limit batch effects in downstream analyses. For each cell type, only peaks detected  
432 in all the studies of origin were considered. The final list of peaks was then generated by merging  
433 each set of reproducible peaks. Peaks located on chromosome Y were excluded from the rest of the  
434 analyses. ATAC-Seq counts were retrieved for each sample and each peak using featureCounts (Liao,  
435 Smyth, and Shi 2014).

436

## 437 **Identification of cell-type specific markers**

### 438 **Differential accessibility analysis**

439 To identify cell-type specific markers, we split the samples collection in ten folds (created with the  
440 *create\_folds* function from the R package splitTools (Mayer 2023)). For each fold, we performed  
441 pairwise differential accessibility analysis across the ten cell types considered in the reference  
442 samples as well as the ENCODE samples from diverse organs. The differential analysis was performed  
443 using limma ((Ritchie et al. 2015), version 3.56.2). Effective library sizes were computed using the  
444 method of trimmed mean of M-values (TMM) from the edgeR package in R ((Robinson, McCarthy,  
445 and Smyth 2010), version 3.42.4). Due to differences of library size across all samples collected, we  
446 used voom from the limma package (Law et al. 2014) to transform the data and model the mean-

447 variance relationship. Finally, a linear model was fitted to the data to assess the differential  
448 accessibility of each peak across each pair of cell types. To identify our marker peaks, all peaks with  
449 log<sub>2</sub> fold change higher than 0.2 were selected and ranked by their maximum adjusted *p*-value across  
450 all pairwise comparisons. The top 200 features (with the lowest maximum adjusted *p*-value) were  
451 considered as cell-type specific marker peaks. The marker peaks identified in at least three folds were  
452 considered in the final list of marker peaks.

453

#### 454 **Marker peaks filtering**

455 Modules of open chromatin regions accessible in all (universal modules) or in specific human tissues  
456 have been identified in the study Zhang *et al.* (K. Zhang et al. 2021). These regions were used to  
457 refine the set of marker peaks and exclude peaks with residual accessibility in other cell types than  
458 those considered for deconvolution. More precisely, for immune, endothelial and fibroblasts specific  
459 peaks, we filtered out the peaks overlapping the universal modules as well as the tissue specific  
460 modules except the immune (modules 8 to 25), endothelial (modules 26 to 35) and stromal related  
461 modules (modules 41 to 49 and 139-150) respectively. As a second filtering step, we retained  
462 markers exhibiting the highest correlation patterns in tumor bulk samples from different cancer  
463 types, *i.e.*, The Cancer Genome Atlas (TCGA) samples (Corces et al. 2018). We used the Cancer  
464 Genomics Cloud (CGC) (Lau et al. 2017) to retrieve the ATAC-Seq counts for each marker peaks in  
465 each TCGA sample (using *featureCounts*). For each set of cell-type specific peaks, we identified the  
466 most correlated peaks using the *findCorrelation* function of the caret R package ((Kuhn 2008), version  
467 6.0-94) with a correlation cutoff value corresponding to the 90<sup>th</sup> percentile of pairwise Pearson  
468 correlation values.

469

#### 470 **Evaluation of the study of origin batch effect**

471 To identify potential batch effect issues, we run principal component analysis (PCA) based on the  
472 cell-type specific peaks after normalizing ATAC-Seq counts using full quantile normalization (FQ-FQ)

473 implemented in the EDASeq R package (Risso et al. 2011) to correct for depth and GC biases. These  
474 data were used to visualize the data in two-dimensional space running Uniform Manifold  
475 Approximation (UMAP) based on the PBMC and TME markers (Figure 2B). We also run PCA and used  
476 the ten first principal components to evaluate distances between samples and compute silhouette  
477 coefficients based on the cell type and study of origin classifications.

478

### 479 **Building the reference profiles**

480 It has been previously demonstrated in the context of RNA-Seq based deconvolution approaches  
481 (Racle et al. 2017; Sturm et al. 2019) that the transcripts per million (TPM) transformation is  
482 appropriate to estimate cell fractions from bulk mixtures. We thus normalized the ATAC-Seq counts  
483 of the reference samples using a TPM-like transformation, *i.e.*, dividing counts by peak length,  
484 correcting samples counts for depth and rescaling counts so that the counts of each sample sum to  
485  $10^6$ . We then computed for each peak the median of the TPM-like counts across all samples from  
486 each cell type to build the reference profiles of the ten cell types considered in the EPIC-ATAC  
487 framework (Figure 2C). In the EPIC algorithm, weights reflecting the variability of each feature of the  
488 reference profile can be considered in the constrained least square optimization. We thus also  
489 computed the inter-quartile range of the TPM-like counts for each feature in each cell type. Two  
490 ATAC-Seq reference profiles are available in the EPIC-ATAC framework: (i) a reference profile  
491 containing profiles for B cells, CD4+ T cells, CD8+ T cells, NK, monocytes, dendritic cells and  
492 neutrophils to deconvolve PBMC samples, and (ii) a reference profile containing profiles for B cells,  
493 CD4+ T cells, CD8+ T cells, NK, dendritic cells, macrophages, neutrophils, fibroblasts and endothelial  
494 cells to deconvolve tumor samples. The reference profiles are available in the EPICATAC R package  
495 and the reference profiles restricted to our cell-type specific marker peaks are available in the  
496 Supplementary Tables 2 and 3.

497

### 498 **Assessing the reproducibility of the marker peaks signal in independent samples**

499 We evaluated the chromatin accessibility level of the marker peaks in samples that were not included  
500 in the peak calling step. Firstly, we considered samples from two independent studies (Ucar et al.  
501 2017; Carvalho et al. 2021) providing pure ATAC-Seq data for five immune cell types (*i.e.*, B, CD4+ T  
502 cells, CD8+ T cells, Monocytes, Macrophages) (Figure 2D). To consider the other cell types, samples  
503 that were excluded from the reference dataset due to a low TSS enrichment score were also  
504 considered in this validation dataset (Supplementary Table 1). Secondly, we collected the data from a  
505 single-cell atlas chromatin accessibility from human tissues and considered the cell types included in  
506 our reference data (K. Zhang et al. 2021) (Figure 2E). We used the cell-type annotations provided in  
507 the original study (GEO accession number: GSE184462). The Signac R package ((Stuart et al. 2021),  
508 1.9.0) was used to extract fragments counts for each cell and each marker peak and the ATAC-Seq  
509 signal of each marker peak was averaged across all cells of each cell type.

510

#### 511 **Annotation of the marker peaks**

512 The cell-type specific markers were annotated using ChIPseeker R package ((Yu, Wang, and He 2015),  
513 version 1.34.1) and the annotation from *TxDb.Hsapiens.UCSC.hg38.knownGene* in R to identify the  
514 regions in which the marker peaks are (*i.e.*, promoter, intronic regions, etc.) and ChipEnrich to  
515 associate each peak to the nearest gene TSS (Welch et al. 2014). The nearest genes identified were  
516 then compared to cell-type marker genes listed in the PanglaoDB (Franzén, Gan, and Björkegren  
517 2019) and CellMarker databases (Hu et al. 2023). PanglaoDB provides an online interface to explore a  
518 large collection on single-cell RNA-Seq data as well as a community-curated list of cell-type marker  
519 genes. CellMarker is a database providing a large set of curated cell-type markers for more than 400  
520 cell types in human tissues retrieved from a large collection of single-cell studies and flow cytometry,  
521 immunostaining or experimental studies. ChipEnrich was also used to perform gene set enrichment  
522 and identify for each set of cell-type specific peaks potential biological pathways regulated by the  
523 marker peaks. The enrichment analysis was performed using the *chipenrich* function (*genesets =*  
524 *"GOBP"*, *locusdef = "nearest\_tss"*) from the *chipenrich* R package (v2.22.0).

525 Chromatin accessibility peaks can also be annotated for chromatin binding proteins (CBPs) such as  
526 transcription factors (TFs), whose potential binding in the peak region is reported in databases. In our  
527 study we chose the JASPAR2022 (Castro-Mondragon et al. 2022) database and the ReMap database  
528 (Hammal et al. 2022).

529 Using the JASPAR2022 database, we assessed, for each cell type, whether the cell-type specific  
530 marker peaks were enriched in specific TFs motifs using two TFs enrichment analysis frameworks:  
531 Signac (Stuart et al. 2021) and MonaLisa (Machlab et al. 2022). For the MonaLisa analysis, the cell-  
532 types specific markers peaks were categorized in bins of sequences, one bin per cell type (use of the  
533 *calcBinnedMotifEnrR* function). To test for an enrichment of motifs, the sequences of each bin were  
534 compared to a set of background peaks with similar average size and GC composition obtained by  
535 randomly sampling regions in all the peaks identified from the reference dataset. The enrichment  
536 test was based on a binomial test. For the Signac analysis, we used the *FindMotif* function to identify  
537 over-represented TF motifs in each set of cell-type specific marker peaks (query). This function used a  
538 hypergeometric test to compare the number of query peaks containing the motif with the total  
539 number of peaks containing the motif in the background regions (matched to have similar GC  
540 content, region length and dinucleotide frequencies as the query regions), corresponding in our case  
541 to the peaks called in the reference dataset.

542 The ReMap database associates chromatin binding proteins (CBPs), including TFs, transcriptional  
543 coactivators and chromatin-remodeling factors, to their DNA binding regions based on DNA-binding  
544 experiments such as chromatin immunoprecipitation followed by sequencing (ChIP-seq). For each  
545 association of a CBP to its binding region, the cell type in which the binding has been observed is  
546 reported in the ReMap database (biotype). We used the ReMapEnrich R package (version 0.99) to  
547 test if the cell-type specific marker peaks are significantly enriched in CBPs-binding regions listed in  
548 the Remap 2022 catalog. We considered the non-redundant peaks catalog from Remap 2022,  
549 containing non-redundant binding regions for each CBP in each biotype. Similarly to the previously  
550 mentioned enrichment methods, we chose the consensus peaks called in the reference samples as

551 universe for the enrichment test. Note that, for each cell type, an enrichment was retained only if the  
552 biotype in which the CBP-regions were identified matched the correct cell-type.

553

#### 554 **Running EPIC-ATAC on bulk ATAC-Seq data**

555 The samples used to generate the reference profiles were aligned using the hg38 reference genome.

556 To assure the compatibility of any input bulk ATAC-Seq dataset with the EPIC-ATAC marker peaks and

557 reference profiles, we provide an option to lift over hg19 datasets to hg38 (use of the liftOver R

558 package). Subsequently, the features of the input bulk matrix are matched to our reference profiles

559 features. To match both sets of features, we determine for each peak of the input bulk matrix the

560 distance to the nearest peak in the reference profiles peaks. Overlapping regions are retained and

561 the feature IDs are matched to their associated nearest peaks. If multiple features are matched to

562 the same reference peak, the counts are summed. In RNA-Seq based deconvolution, EPIC uses an

563 estimation of the amount of mRNA in each reference cell type to derive cell proportions. For the

564 ATAC-Seq based deconvolution these values were set to 1 to give similar weights to all cell-types

565 quantifications.

566

#### 567 **Datasets used for the evaluation of ATAC-Seq deconvolution**

##### 568 **PBMCs ATAC-Seq data from healthy donors**

##### 569 ***Peripheral blood mononuclear cell (PBMC) isolation***

570 Venous blood from five healthy donors was collected at the local blood transfusion center of Geneva

571 in Switzerland, under the approval of the Geneva University Hospital's Institute Review Board, upon

572 written informed consent and in accordance with the Declaration of Helsinki. PBMCs were freshly

573 isolated by Lymphoprep (Promega) centrifugation (1800 rpm, 20 minutes, without break, room

574 temperature). Red blood cell lysis was performed using red blood lysis buffer (Qiagen) and platelets

575 were removed by centrifugation (1000 rpm, 10 minutes without break, room temperature). Cells

576 were counted and immediately used.

577

578 ***Flow cytometry***

579 Immune cell populations were identified using multiparameter flow cytometry and the following  
580 antibodies: FITC anti-human CD45RA (HI100, Biolegend), PerCP-Cyanine5.5 anti-human CD19 (H1B19,  
581 Biolegend), PE anti-human CD3 (SK7, Biolegend), PE-Dazzle anti-human CD14 (M0P9, BD  
582 Biosciences), PE-Cyanine7 anti-human CD56 (HCD56, Biolegend), APC anti-human CD4 (RPA-T4,  
583 Biolgend), APC-Cyanine7 anti-human CCR7 (G043H7, Biolegend), Brilliant Violet 421 anti-human CD8  
584 (RPA-T8, Biolegend), Brilliant Violet 510 anti-human CD25 (BC96, Biolegend), Brilliant Violet 711 anti-  
585 human CD16 (3G8, Biolegend), Brilliant Violet 786 anti-human CD127 (A019D5, Biolegend), Ultra-  
586 Brilliant Violet anti-human CD45 (HI30, BD Biosciences), FITC anti-human Celc9a (8F9, Miltenyi) , PE  
587 anti-human XCR1 (S15046E, Biolegend), PE-Dazzle anti-human BDCA-2 (201A, Biolegend), APC anti-  
588 human BDCA-3 (AD5-14H12, Miltenyi), Brilliant Violet 421 anti-human CD3 (UCHT1, Biolegend),  
589 Brilliant Violet 421 anti-human CD14 (M5E2, BD Pharmingen), Brilliant Violet 421 anti-human CD19  
590 (SJ25C1, Biolegend), Brilliant Violet 510 anti-human BDCA-1 (L161, Biolegend), Brilliant Violet 650  
591 anti-human CD11c (3.9, Biolegend), Brilliant Violet 711 anti-human CD11c (N418, Biolegend) and  
592 Brilliant Violet 711 anti-human HLA-DR (L243, Biolegend). Dead cells were excluded using the Zombie  
593 UV™ Fixable Viability Kit (Biolegend). Intracellular staining was performed after fixation and  
594 permeabilization of the cells with the FoxP3 Transcription Factor Staining Buffer Set (00-5523-00,  
595 Invitrogen) using Alexa 700 anti-human FoxP3 antibody (259D/C7, BD Biosciences). Data were  
596 acquired on LSRFortessa flow cytometer and analysed using FlowJo software (v10.7.1).

597

598 ***Cell preparation for ATAC-Sequencing***

599 50000 CD45+ cells were sorted from total PBMCs using anti-human Ultra-Brilliant Violet (BUV395)  
600 CD45 (HI30, BD Biosciences) with a FACSAria II (Becton Dickinson) and were collected in PBS with  
601 10% Foetal Bovine Serum (FBS). Cell pellets were resuspended in cold lysis buffer (10mM Tris-Cl pH  
602 7.4, 10mM NaCl, 3mM MgCl<sub>2</sub>, 0,1% NP40 and water) and immediately centrifuged at 600g for 30min



603 at 4°C. Transposition reaction was performed using the Illumina Tagment DNA Enzyme and Buffer kit  
604 (20034210, Illumina) and transposed DNA was eluted using the MinElute PCR Purification Kit  
605 (Qiagen). Libraries were generated by PCR amplification using indexing primers and NEBNext High-  
606 Fidelity Master Mix (New England BioLabs) and were purified using AMPure XP beads (A63880,  
607 Beckman Coulter). Libraries were quantified by a fluorometric method (Qubit, Life Technologies) and  
608 their quality assessed on a Fragment Analyzer (Agilent Technologies). Sequencing was performed as a  
609 paired end 50 cycles run on an Illumina NovaSeq 6000 (v1.5 reagents) at the Genomic Technologies  
610 Facility (GTF) in Lausanne, Switzerland. Raw sequencing data were demultiplexed using the  
611 bcl2fastq2 Conversion Software (version 2.20, Illumina).

612

### 613 ***Data processing***

614 The same steps as for the processing of the reference ATAC-Seq samples were followed. (See Pre-  
615 processing of the ATAC-Seq datasets).

616

### 617 **ATAC-Seq pseudobulk data from PBMCs and cancer samples**

618 To evaluate the accuracy of our ATAC-Seq deconvolution framework, we generated pseudo-bulk  
619 datasets from 5 single-cell datasets:

- 620 • **PBMC pseudobulk dataset:** combination of three single-cell datasets for PBMCs.
  - 621 ○ Dataset 1 corresponds to a scATAC-Seq dataset obtained from Satpathy et al.  
622 (Satpathy et al. 2019) (GEO accession number: GSE129785). This dataset contains  
623 FACS-sorted populations of PBMCs. Since the cells of some cell types came from a  
624 unique donor, all the cells of this dataset were aggregated to form one pseudobulk.  
625 Ground truth cell fractions were obtained by dividing the number of cells in each cell  
626 type by the total number of cells.
  - 627 ○ Dataset 2 (included in the PBMC pseudobulk dataset) was retrieved from Granja *et*  
628 *al.* (Granja et al. 2019) (GEO accession number GSE139369). B cells, monocytes,

629 dendritic, CD8+, CD4+ T, NK cells, neutrophils from healthy donors were considered.

630 The neutrophil cells came from a single donor. As for dataset 1, we thus aggregated

631 all the cells to generate one pseudobulk. Ground truth cell fractions were obtained

632 by dividing the number of cells in each cell type by the total number of cells.

633 ○ Dataset 3 (included in the PBMC pseudobulk dataset) corresponds to the 10X

634 multiome dataset of PBMC cells (10x Genomics 2021). Since these data come from

635 one donor, one pseudobulk sample was generated for this dataset. The pseudobulk

636 was generated by averaging the ATAC-Seq signal from all cells from the following cell

637 types: B cells, CD4+ T cells, CD8+ T cells, NK cells, Dendritic cells and monocytes.

638 • **Basal cell carcinoma dataset:** obtained from the study of Satpathy *et al.* (Satpathy et al.

639 2019). This dataset is a scATAC-Seq dataset composed of 13 basal cell carcinoma samples

640 composed of immune (B cells, plasma cells, CD4+ T cells, CD8+ T cells, NK cells, myeloid cells),

641 stromal (endothelial and fibroblasts) and cancer cells. Plasma cells and cancer cells were both

642 considered as uncharacterized cells (*i.e.*, cell types not included in the reference profiles).

643 Cell annotations were retrieved from the original study.

644 • **Gynecological cancer dataset:** obtained from the study of Regner *et al.* (Regner et al. 2021)

645 (GEO accession number GSE173682). In this study, the authors performed scATAC-Seq on 11

646 gynecological cancer samples from two tumor sites (*i.e.* endometrium and ovary) and

647 composed of immune (B cells, NK and T cells grouped under the same cell-type annotation,

648 macrophages, mast cells), stromal (fibroblast, endothelial, smooth muscle) and cancer cells.

649 Mast cells, smooth muscle and cancer cells were considered as uncharacterized cells. Cell

650 annotations were retrieved from the original study.

651 For Basal cell carcinoma and Gynecological cancer datasets, one pseudobulk per sample was

652 generated and ground truth cell fractions were obtained for each sample by dividing the number of

653 cells in each cell type by the total number of cells in the sample.

654 For each dataset, raw fragments files were downloaded from the respective GEO accession numbers  
655 and data were preprocessed using ArchR ((Granja et al. 2021), ArchR R package 1.0.2). Cells with TSS  
656 score below four were removed. Doublets removal was performed using the *doubletsRemoval*  
657 function from ArchR. To match as much as possible real bulk ATAC-seq data processing, peak calling  
658 was not performed on each cell type or cell cluster as usually done in scATAC-Seq studies but using  
659 all cells for each dataset from the PBMC pseudobulk data or grouping cells by sample for the Basal  
660 cell carcinoma and Gynecological cancer datasets. Peak calling was performed using MACS2 within  
661 the ArchR framework. Fragments counts were extracted using ArchR for each peak called to generate  
662 single-cell peak counts matrices. These matrices were normalized using a TPM-like transformation,  
663 *i.e.*, dividing counts by peak length and correcting samples counts for depth. Finally, for each peak,  
664 the average of the normalized counts was computed across all the cells for each dataset from the  
665 PBMC pseudobulk data and across all the cells of each sample for the Basal cell carcinoma and  
666 Gynecological cancer datasets. Averaged data were then rescaled so that the sum of counts of each  
667 sample sum to  $10^6$ .

668

#### 669 **Bulk ATAC-Seq data from a breast cancer cohort**

670 Bulk ATAC-Seq samples from a breast cancer cohort was obtained from Kumegawa *et al.* (Kumegawa  
671 et al. 2023). These data include 42 breast cancer samples which can be classified based on two  
672 features: (i) the breast cancer subtype ER+/HER2- or triple negative, and (ii) the molecular  
673 classification provided by the original study (CA-A, CA-B and CA-C). The ATAC-Seq raw counts and the  
674 samples metadata were retrieved from figshare (Kumegawa 2023). As for the previously mentioned  
675 datasets, raw counts were normalized using the TPM-like transformation prior to bulk deconvolution.

676

#### 677 **Benchmarking of the EPIC-ATAC framework against other existing deconvolution tools**

678 The performances of the EPIC-ATAC framework were benchmarked against the following  
679 deconvolution tools:

- 680       • *quantIseq* (Finotello et al. 2019) is a deconvolution tool using constrained least square  
681       regression to deconvolve RNA-Seq bulk samples. No reference profiles are available in this  
682       framework to perform ATAC-Seq deconvolution and *quantIseq* does not provide the option  
683       to automatically build reference profiles from pure bulk samples. *quantIseq* was thus run  
684       using the reference profiles derived in this work for the EPIC-ATAC framework and the  
685       *quantIseq* function from the *quantiseqr* R package (parameters: scaling set to 1 for all cell  
686       types and method set to "lsei").
- 687       • *DeconPeaker* (H. Li et al. 2020) relies on SIMPLS, a variant of partial least square regression  
688       to perform bulk RNA-Seq and bulk ATAC-Seq deconvolution. ATAC-Seq reference profiles are  
689       available in this deconvolution framework however not all cell types considered in the EPIC-  
690       ATAC framework are included in the *DeconPeaker* reference profiles. This tool was thus run  
691       using different reference profiles: (i) the reference profiles derived in this work for the EPIC-  
692       ATAC framework (corresponds to "*DeconPeaker*" or "*DeconPeaker\_ourmarkers*" in our  
693       analyses), and (ii) reference profiles automatically generated by *DeconPeaker* from the  
694       sorted reference samples collected in this work (corresponds to "*DeconPeaker\_cust.*" in our  
695       analyses). The results of *DeconPeaker* obtained using its original markers and profiles are  
696       also provided for the cell types in common with the cell types considered in this work in  
697       Supplementary Figures 3 and 5. Deconvolution was run using the deconvolution module  
698       *deconPeaker* (using *findctsp*s with the following parameter: `--lib-strategy=ATAC-Seq`).  
699       *DeconPeaker* outputs cell-type proportions relative to the total amount of cells from the  
700       reference cell types.
- 701       • *CIBERSORTx* (Newman et al. 2019) is a deconvolution algorithm based on linear support  
702       vector regression. *CIBERSORTx* does not provide ATAC-Seq reference profiles, however it is  
703       possible to automatically generate new profiles from a set of pure bulk samples. This tool  
704       was thus run using different reference profiles: i) the reference profiles derived in this work  
705       for the EPIC-ATAC framework (corresponds to "*CIBERSORTx*" or "*CIBERSORTx\_ourMarkers*"

706 in our analyses), and ii) reference profiles automatically generated by CIBERSORTx from the  
707 sorted reference samples collected in this work (corresponds to “CIBERSORTx\_cust.” in our  
708 analyses). To run CIBERSORTx, we used the docker container provided by the authors of  
709 CIBERSORTx on their website. The algorithm was run using the default options (i.e --absolute  
710 FALSE, --rmbatchBmode FALSE and --rmbatchSmode FALSE), which results in cell-type  
711 proportions relative to the total amount of cells from the reference cell types.

712 • ABIS (Monaco et al. 2019) uses robust linear modeling to estimate cell-type proportions in  
713 bulk RNA-Seq samples. No ATAC-Seq reference profiles are available in the deconvolution  
714 framework. ABIS was run using the EPIC-ATAC reference profiles by using the *rlm* function  
715 from the MASS R package (as performed in the *deconvolute\_abis* function from the  
716 *immunedecon* R package (Sturm et al. 2019) was used to quantify each cell type from the  
717 reference profiles. The cell-types quantifications returned by this approach are in arbitrary  
718 units. To compare the estimations and the true cell proportions, we scaled the estimations of  
719 each sample between 0 and 1 to obtained relative proportions.

720 • MCPcounter (Becht et al. 2016): MCPcounter returns scores instead of cell type proportions.  
721 The scores were obtained using the *appendSignatures* function from the MCPcounter R  
722 package by providing the list of marker peaks specific to each cell type. The cell-type scores  
723 are not comparable between cell type, MCPcounter was thus included only in the evaluation  
724 of the performances in each cell type separately.

725

726 For all the tools, TPM-like data were used as input bulk samples for the deconvolution.

727 Since CIBERSORTx, ABIS and DeconPeaker do not predict proportions of uncharacterized cells, we  
728 performed two benchmarking analyses: (i) including all cell types and (ii) excluding the cell types that  
729 are absent from the reference profiles (uncharacterized cells) and rescaling the estimated and true  
730 proportions of the immune cells, endothelial cells and fibroblasts so that their sum equals 1.

731

732 **Comparing deconvolution based on RNA-Seq, gene activity or peaks features.**

733 100 pseudobulks were generated from the 10X PBMC multiome dataset (10x Genomics 2021) based  
734 on 3000 cells for each pseudobulk. Cell fractions were defined using the *rdirichlet* function from the  
735 *gtools* R package. Three sets of features were extracted from the data, *i.e.*, gene expression features  
736 extracted from the RNA-Seq layer, ATAC-Seq peaks and gene activity derived from the ATAC-Seq  
737 layer. The same cells sampling was considered for each modality.

738 Gene activity features were extracted from the single-cell data using ArchR (1.0.2), which considers  
739 distal elements and adjusts for large differences in gene size in the gene activity score calculation.

740 Gene activity pseudobulks were built by averaging the gene activity scores across all cells belonging  
741 to the pseudobulk. For ATAC-Seq pseudobulk, peaks called using ArchR on all cells from the 10X  
742 dataset were considered (see the method section “ATAC-Seq pseudobulk data from PBMCs and  
743 cancer samples”) and counts were averaged across all cells of each pseudobulk. For RNA-Seq  
744 pseudobulks, counts were also averaged across all cells of each pseudobulk. All aggregated data were  
745 depth normalized across each features to  $10^6$ . Cell-type deconvolution was performed on each  
746 pseudobulk using EPIC-ATAC on the peak matrix using our ATAC-Seq marker peaks and reference  
747 profiles. The RNA-Seq and gene activity pseudobulks were deconvolved with EPIC.

748

749 **Code availability**

750 The code to download and preprocess publicly available ATAC-Seq samples as well as the code used  
751 to identify our cell-type specific marker peaks and generate the reference profiles is available on  
752 GitHub ([https://github.com/GfellerLab/EPIC-ATAC\\_Manuscript](https://github.com/GfellerLab/EPIC-ATAC_Manuscript)). A README file is provided on the  
753 GitHub repository with more details on how to use the code.

754 The code to perform ATAC-Seq deconvolution using the EPIC-ATAC framework is available as an R  
755 package called EPICATAC and is available on GitHub (<https://github.com/GfellerLab/EPIC-ATAC>).

756

757 **Data availability**

758 The newly generated ATAC-Seq data have been deposited on Zenodo (doi:  
759 10.5281/zenodo.8431792). The other data related to this work are available in the supplementary  
760 tables and on the Zenodo deposit (doi: 10.5281/zenodo.8431792).

761

762 **Competing interests:**

763 The authors declare that they have no competing interests.

764

765 **Acknowledgement:**

766 We thank the Lausanne Genomic Technologies Facility, University of Lausanne, Switzerland  
767 (<https://www.unil.ch/gtf/en/home.html>) for the sequencing of the PBMC samples as well as Yan Liu,  
768 Dana Moreno and Matei Teleman for testing the EPICATAC R package. Some of the illustrations were  
769 created with BioRender.com.

770

771 **Authors contributions:**

772 Conceptualization: AAGG, JR, DG; Data curation: AAGG; Software: AAGG, JR, DG; Experiments: MF,  
773 CJ; Visualization: AAGG, JR, DG; Methodology: AAGG, JR, DG; Writing—original draft: AAGG, DG;  
774 Writing—review and editing: all authors.

775

776 **Figure legends:**

777 ***Figure 1: Graphical description of the identification of cell-type specific marker peaks and reference***  
778 ***ATAC-Seq profiles included in the EPIC-ATAC framework. 1) 564 pure ATAC-Seq data of sorted cells***  
779 ***were collected to build reference profiles for cancer-relevant cell populations. 2) Cell-type specific***  
780 ***marker peaks were identified using differential accessibility analysis. 3) Markers with previously***  
781 ***observed chromatin accessibility in human healthy tissues were then excluded. 4) For tumor bulk***  
782 ***deconvolution, the set of remaining marker peaks was refined by selecting markers with correlated***  
783 ***behavior in tumor bulk samples. 5) The cell-type specific marker peaks and reference profiles were***

784 *finally integrated in the EPIC-ATAC framework to perform bulk ATAC-Seq deconvolution. Parts of this*  
785 *figure were created with BioRender.com.*

786

787 **Figure 2: ATAC-Seq data from sorted cell populations reveal cell-type specific marker peaks and**  
788 **reference profiles. A)** *Number of samples collected for each cell type. The colors correspond to the*  
789 *different studies of origin. B)* *Representation of the collected samples in 2D using UMAP based on the*  
790 *PBMC markers (left) and TME markers (right). Colors correspond to cell types. C)* *Scaled averaged*  
791 *chromatin accessibility of the cell-type specific marker peaks (rows) in each cell type (columns) in the*  
792 *ATAC-Seq reference samples used to identify the marker peaks. D)* *Scaled averaged chromatin*  
793 *accessibility of the marker peaks in external ATAC-Seq data from samples of pure cell types excluded*  
794 *from the reference samples (see Material and Methods). E)* *Scaled averaged chromatin accessibility of*  
795 *the marker peaks in an external scATAC-Seq dataset (Human Atlas (K. Zhang et al. 2021)). F)*  
796 *Distribution of the marker peak distances to the nearest transcription start site (TSS) (left panel) and*  
797 *the ChIPSeeker annotations (right panel). G)* *Significance ( $-\log_{10}(q.value)$ ) of pathways (columns)*  
798 *enrichment test obtained using ChIP-Enrich on each set of cell-type specific marker peaks (rows). A*  
799 *subset of relevant enriched pathways is represented. Colors of the names of the pathways correspond*  
800 *to cell types where the pathways were found to be enriched. When pathways were significantly*  
801 *enriched in more than one set of peaks, pathways names are written in bold.*

802

803 **Figure 3: EPIC-ATAC accurately estimates immune cell fractions in PBMC ATAC-Seq samples. A)**  
804 *Schematic description of the experiment designed to validate the ATAC-Seq deconvolution on PBMC*  
805 *samples. B)* *Comparison between cell-type proportions predicted by EPIC-ATAC and the true*  
806 *proportions in the PBMC bulk dataset. Symbols correspond to donors. C)* *Comparison between the*  
807 *proportions of cell-types predicted by EPIC-ATAC and the true proportions in the PBMC pseudobulk*  
808 *dataset. Symbols correspond to pseudobulks. D)* *Pearson correlation (left) and RMSE (right) values*  
809 *obtained by each deconvolution tool on the PBMC bulk dataset. The EPIC-ATAC results are highlighted*



810 *in red. E) Pearson correlation (left) and RMSE (right) values obtained by each deconvolution tool on*  
811 *the PBMC pseudobulk dataset. Parts of this figure (panel 1) were created with BioRender.com.*

812

813 **Figure 4: EPIC-ATAC accurately predicts fractions of cancer and non-malignant cells in tumor**  
814 **samples. A)** Comparison between cell-type proportions estimated by EPIC-ATAC and true proportions  
815 for the basal cell carcinoma (top) and gynecological (bottom) pseudobulk datasets. Symbols  
816 correspond to pseudobulks. **B)** Pearson's correlation and RMSE values obtained for the deconvolution  
817 tools included in the benchmark. EPIC-ATAC is highlighted in red. **C)** Same analyses as in panels B,  
818 with the uncharacterized cell population excluded for the evaluation of the predictions accuracy. The  
819 predicted and true proportions of the immune, stromal and vascular cell types were rescaled to sum  
820 to 1.

821

822 **Figure 5: T cell subtypes quantification reveals the ATAC-Seq deconvolution limits for closely**  
823 **related cell types. A)** Comparison of the proportions estimated by EPIC-ATAC and the true proportions  
824 for PBMC samples (PBMC experiment and PBMC pseudobulk samples combined) (top) and the basal  
825 cell carcinoma pseudobulks (bottom). Predictions of the proportions of CD4+ and CD8+ T-cells were  
826 obtained using the reference profiles based on the major cell types and subtype predictions using the  
827 reference profiles including the T-cell subtypes. **B)** Pearson's correlation values obtained by EPIC-ATAC  
828 in each cell type.

829

830 **Figure 6: EPIC-ATAC accurately infers the immune contexture in a bulk ATAC-Seq breast cancer**  
831 **cohort. A)** Proportions of different cell types predicted by EPIC-ATAC in the samples stratified based  
832 on two breast cancer subtypes. **B)** Proportions of different cell types predicted by EPIC-ATAC in the  
833 samples stratified based on three ER+/HER2- subgroups. Wilcoxon test p-values are represented at  
834 the top of the boxplots.

835

836 **Figure 7: EPIC-ATAC performs similarly to EPIC RNA-seq based deconvolution and better than gene**  
837 **activity based deconvolution. Pearson's correlation (left) and RMSE (right) values comparing the**  
838 **proportions predicted by the ATAC-Seq deconvolution, the RNA-Seq deconvolution and the GA-based**  
839 **RNA deconvolution and true cell-type proportions in the 100 pseudobulks simulated from the 10x**  
840 **multiome PBMC dataset (10x Genomics 2021). Dots correspond to outlier pseudobulks.**

841

842 **Supplementary Figures:** Additional file named Supplementary\_figures.pdf

843 **Supplementary Tables:**

844 **Sup. Table 1:** Metadata of the ATAC-Seq samples used in the study

845 **Sup. Table 2:** Averaged chromatin accessibility of the PBMC marker peaks in each cell-type.

846 **Sup. Table 3:** Averaged chromatin accessibility of the TME marker peaks in each cell-type.

847 **Sup. Table 4:** Annotations of the cell-type specific PBMC marker peaks

848 **Sup. Table 5:** Annotations of the cell-type specific TME marker peaks

849 **Sup. Table 6:** GO pathways enriched in each set of cell-type specific PBMC marker peaks

850 **Sup. Table 7:** GO pathways enriched in each set of cell-type specific TME marker peaks

851 **Sup. Table 8:** Averaged chromatin accessibility of the PBMC marker peaks in each cell-type (T cells  
852 subtypes included).

853 **Sup. Table 9:** Averaged chromatin accessibility of the TME marker peaks in each cell-type (T cells  
854 subtypes included).

855 **Sup. Table 10:** Annotations of the cell-type specific PBMC marker peaks (T cells subtypes included).

856 **Sup. Table 11:** Annotations of the cell-type specific TME marker peaks (T cells subtypes included).

857 **Sup. Table 12:** GO pathways enriched in each set of cell-type specific PBMC marker peaks (T cell  
858 subtypes).

859 **Sup. Table 13:** GO pathways enriched in each set of cell-type specific TME marker peaks (T cell  
860 subtypes).

861

862 **References:**

863

864 10x Genomics. 2021. "PBMC from a Healthy Donor - Granulocytes Removed Through Cell Sorting

865 (10k)." 2021. [https://www.10xgenomics.com/resources/datasets/pbmc-from-a-healthy-donor-](https://www.10xgenomics.com/resources/datasets/pbmc-from-a-healthy-donor-granulocytes-removed-through-cell-sorting-10-k-1-standard-2-0-0)

866 [granulocytes-removed-through-cell-sorting-10-k-1-standard-2-0-0](https://www.10xgenomics.com/resources/datasets/pbmc-from-a-healthy-donor-granulocytes-removed-through-cell-sorting-10-k-1-standard-2-0-0).

867 Arneson, Douglas, Xia Yang, and Kai Wang. 2020. "MethylResolver—a Method for Deconvoluting Bulk

868 DNA Methylation Profiles into Known and Unknown Cell Contents." *Communications Biology* 3.

869 <https://doi.org/10.1038/s42003-020-01146-2>.

870 Avila Cobos, Francisco, José Alquicira-Hernandez, Joseph E. Powell, Pieter Mestdagh, and Katleen De

871 Preter. 2020. "Benchmarking of Cell Type Deconvolution Pipelines for Transcriptomics Data."

872 *Nature Communications* 11 (1): 1–14. <https://doi.org/10.1038/s41467-020-19015-1>.

873 Avila Cobos, Francisco, Jo Vandesompele, Pieter Mestdagh, and Katleen De Preter. 2018.

874 "Computational Deconvolution of Transcriptomics Data from Mixed Cell Populations."

875 *Bioinformatics* 34 (11): 1969–79. <https://doi.org/10.1093/BIOINFORMATICS/BTY019>.

876 Becht, Etienne, Nicolas A. Giraldo, Laetitia Lacroix, Bénédicte Buttard, Nabila Elarouci, Florent

877 Petitprez, Janick Selves, et al. 2016. "Estimating the Population Abundance of Tissue-Infiltrating

878 Immune and Stromal Cell Populations Using Gene Expression." *Genome Biology* 17 (October):

879 218. <https://doi.org/10.1186/S13059-016-1070-5/TABLES/4>.

880 Bonnema, Joy D., Larry M. Karnitz, Renee A. Schoon, Robert T. Abraham, and Paul J. Leibson. 1994.

881 "Fc Receptor Stimulation of Phosphatidylinositol 3-Kinase in Natural Killer Cells Is Associated

882 with Protein Kinase C-Independent Granule Release and Cell-Mediated Cytotoxicity." *Journal of*

883 *Experimental Medicine* 180 (4): 1427–35. <https://doi.org/10.1084/JEM.180.4.1427>.

884 Buenrostro, Jason D., Paul G. Giresi, Lisa C. Zaba, Howard Y. Chang, and William J. Greenleaf. 2013.

885 "Transposition of Native Chromatin for Fast and Sensitive Epigenomic Profiling of Open

886 Chromatin, DNA-Binding Proteins and Nucleosome Position." *Nature Methods* 10 (12): 1213–18.

887 <https://doi.org/10.1038/nmeth.2688>.

- 888 Burdziak, Cassandra, Elham Azizi, Sandhya Prabhakaran, and Dana Pe'er. 2019. "A Nonparametric  
889 Multi-View Model for Estimating Cell Type-Specific Gene Regulatory Networks." *ArXiv*.
- 890 Calderon, Diego, Michelle L.T. Nguyen, Anja Mezger, Arwa Kathiria, Fabian Müller, Vinh Nguyen,  
891 Ninnia Lescano, et al. 2019. "Landscape of Stimulation-Responsive Chromatin across Diverse  
892 Human Immune Cells." *Nature Genetics* 51 (10): 1494–1505. [https://doi.org/10.1038/s41588-](https://doi.org/10.1038/s41588-019-0505-9)  
893 019-0505-9.
- 894 Carvalho, Klebea, Elisabeth Rebboah, Camden Jansen, Katherine Williams, Andrew Dowey, Cassandra  
895 McGill, and Ali Mortazavi. 2021. "Uncovering the Gene Regulatory Networks Underlying  
896 Macrophage Polarization Through Comparative Analysis of Bulk and Single-Cell Data." *BioRxiv*,  
897 January. <https://doi.org/10.1101/2021.01.20.427499>.
- 898 Castro-Mondragon, Jaime A., Rafael Riudavets-Puig, Ieva Rauluseviciute, Roza Berhanu Lemma, Laura  
899 Turchi, Romain Blanc-Mathieu, Jeremy Lucas, et al. 2022. "JASPAR 2022: The 9th Release of the  
900 Open-Access Database of Transcription Factor Binding Profiles." *Nucleic Acids Research* 50 (D1):  
901 D165–73. <https://doi.org/10.1093/NAR/GKAB1113>.
- 902 Chakravarthy, Ankur, Andrew Furness, Kroopa Joshi, Ehsan Ghorani, Kirsty Ford, Matthew J. Ward,  
903 Emma V. King, et al. 2018. "Pan-Cancer Deconvolution of Tumour Composition Using DNA  
904 Methylation." *Nature Communications* 9 (August). [https://doi.org/10.1038/s41467-018-05570-](https://doi.org/10.1038/s41467-018-05570-1)  
905 1.
- 906 Clarke, Jennifer, Pearl Seol, and Bertrand Clarke. 2010. "Statistical Expression Deconvolution from  
907 Mixed Tissue Samples." *Bioinformatics* 26 (8): 1043–49.  
908 <https://doi.org/10.1093/BIOINFORMATICS/BTQ097>.
- 909 Corces, M. Ryan, Jason D. Buenrostro, Beijing Wu, Peyton G. Greenside, Steven M. Chan, Julie L.  
910 Koenig, Michael P. Snyder, et al. 2016. "Lineage-Specific and Single-Cell Chromatin Accessibility  
911 Charts Human Hematopoiesis and Leukemia Evolution." *Nature Genetics* 48 (August): 1193–  
912 1203. <https://doi.org/10.1038/ng.3646>.
- 913 Corces, M. Ryan, Jeffrey M. Granja, Shadi Shams, Bryan H. Louie, Jose A. Seoane, Wanding Zhou,

- 914 Tiago C. Silva, et al. 2018. “The Chromatin Accessibility Landscape of Primary Human Cancers.”  
915 *Science* 362 (6413). <https://doi.org/10.1126/science.aav1898>.
- 916 Corces, M. Ryan, Alexandro E. Trevino, Emily G. Hamilton, Peyton G. Greenside, Nicholas A. Sinnott-  
917 Armstrong, Sam Vesuna, Ansuman T. Satpathy, et al. 2017. “An Improved ATAC-Seq Protocol  
918 Reduces Background and Enables Interrogation of Frozen Tissues.” *Nature Methods* 14 (10):  
919 959–62. <https://doi.org/10.1038/nmeth.4396>.
- 920 Cusanovich, Darren A., Riza Daza, Andrew Adey, Hannah A. Pliner, Lena Christiansen, Kevin L.  
921 Gunderson, Frank J. Steemers, Cole Trapnell, and Jay Shendure. 2015. “Multiplex Single-Cell  
922 Profiling of Chromatin Accessibility by Combinatorial Cellular Indexing.” *Science* 348 (6237):  
923 910–14. [https://doi.org/10.1126/SCIENCE.AAB1601/SUPPL\\_FILE/PAP.PDF](https://doi.org/10.1126/SCIENCE.AAB1601/SUPPL_FILE/PAP.PDF).
- 924 Feng, Song, Anna Calinawan, Pietro Pugliese, Pei Wang, Michele Ceccarelli, Francesca Petralia, and  
925 Sara J C Gosline. 2023. “Decomprolute : A Benchmarking Platform Designed for Multiomics-  
926 Based Tumor Deconvolution.” *BioRxiv*.
- 927 Finotello, Francesca, Clemens Mayer, Christina Plattner, Gerhard Laschober, Dietmar Rieder, Hubert  
928 Hackl, Anne Krogsdam, et al. 2019. “Molecular and Pharmacological Modulators of the Tumor  
929 Immune Contexture Revealed by Deconvolution of RNA-Seq Data.” *Genome Medicine* 11 (May):  
930 34. <https://doi.org/10.1186/s13073-019-0638-6>.
- 931 Franzén, Oscar, Li Ming Gan, and Johan L.M. Björkegren. 2019. “PanglaoDB: A Web Server for  
932 Exploration of Mouse and Human Single-Cell RNA Sequencing Data.” *Database* 2019: baz046.  
933 <https://doi.org/10.1093/DATABASE/BAZ046>.
- 934 Fridman, Wolf H., Franck Pagès, Catherine Sautès-Fridman, and Jérôme Galon. 2012. “The Immune  
935 Contexture in Human Tumours: Impact on Clinical Outcome.” *Nature Reviews Cancer* 12 (4):  
936 298–306. <https://doi.org/10.1038/nrc3245>.
- 937 Fridman, Wolf H., Laurence Zitvogel, Catherine Sautès-Fridman, and Guido Kroemer. 2017. “The  
938 Immune Contexture in Cancer Prognosis and Treatment.” *Nature Reviews Clinical Oncology*.  
939 Nature Publishing Group. <https://doi.org/10.1038/nrclinonc.2017.101>.

- 940 Ge, Xiangyu, Mojca Frank-Bertoncelj, Kerstin Klein, Amanda McGovern, Tadeja Kuret, Miranda  
941 Houtman, Blaž Burja, et al. 2021. “Functional Genomics Atlas of Synovial Fibroblasts Defining  
942 Rheumatoid Arthritis Heritability.” *Genome Biology* 22 (1): 247.  
943 <https://doi.org/10.1186/S13059-021-02460-6/FIGURES/7>.
- 944 Geng, Degui, Liqin Zheng, Ratika Srivastava, Nicole Asprodites, Cruz Velasco-Gonzalez, and Eduardo  
945 Davila. 2010. “When Toll-like Receptor and T-Cell Receptor Signals Collide: A Mechanism for  
946 Enhanced CD8 T-Cell Effector Function.” *Blood* 116 (18): 3494–3504.  
947 <https://doi.org/10.1182/BLOOD-2010-02-268169>.
- 948 Giles, Josephine R., Sasikanth Manne, Elizabeth Freilich, Derek A. Oldridge, Amy E. Baxter, Sangeeth  
949 George, Zeyu Chen, et al. 2022. “Human Epigenetic and Transcriptional T Cell Differentiation  
950 Atlas for Identifying Functional T Cell-Specific Enhancers.” *Immunity* 55 (3): 557-574.e7.  
951 <https://doi.org/10.1016/J.IMMUNI.2022.02.004>.
- 952 Gong, Ting, and Joseph D. Szustakowski. 2013. “DeconRNASeq: A Statistical Framework for  
953 Deconvolution of Heterogeneous Tissue Samples Based on mRNA-Seq Data.” *Bioinformatics* 29  
954 (8): 1083–85. <https://doi.org/10.1093/BIOINFORMATICS/BTT090>.
- 955 Gosink, Mark M., Howard T. Petrie, and Nicholas F. Tsinoremas. 2007. “Electronically Subtracting  
956 Expression Patterns from a Mixed Cell Population.” *Bioinformatics* 23 (24): 3328–34.  
957 <https://doi.org/10.1093/BIOINFORMATICS/BTM508>.
- 958 Grandi, Fiorella C., Hailey Modi, Lucas Kampman, and M. Ryan Corces. 2022. “Chromatin Accessibility  
959 Profiling by ATAC-Seq.” *Nature Protocols*, April, 1518–52. [https://doi.org/10.1038/s41596-022-](https://doi.org/10.1038/s41596-022-00692-9)  
960 [00692-9](https://doi.org/10.1038/s41596-022-00692-9).
- 961 Granja, Jeffrey M., M. Ryan Corces, Sarah E. Pierce, S. Tansu Bagdatli, Hani Choudhry, Howard Y.  
962 Chang, and William J. Greenleaf. 2021. “ArchR Is a Scalable Software Package for Integrative  
963 Single-Cell Chromatin Accessibility Analysis.” *Nature Genetics* 53 (February): 403–11.  
964 <https://doi.org/10.1038/s41588-021-00790-6>.
- 965 Granja, Jeffrey M., Sandy Klemm, Lisa M. McGinnis, Arwa S. Kathiria, Anja Mezger, M. Ryan Corces,

- 966 Benjamin Parks, et al. 2019. “Single-Cell Multiomic Analysis Identifies Regulatory Programs in  
967 Mixed-Phenotype Acute Leukemia.” *Nature Biotechnology* 37 (12): 1458–65.  
968 <https://doi.org/10.1038/s41587-019-0332-7>.
- 969 Hammal, Fayrouz, Pierre De Langen, Aurelie Bergon, Fabrice Lopez, and Benoit Ballester. 2022.  
970 “ReMap 2022: A Database of Human, Mouse, Drosophila and Arabidopsis Regulatory Regions  
971 from an Integrative Analysis of DNA-Binding Sequencing Experiments.” *Nucleic Acids Research*  
972 50 (D1): D316–25. <https://doi.org/10.1093/NAR/GKAB996>.
- 973 Hu, Congxue, Tengyue Li, Yingqi Xu, Xinxin Zhang, Feng Li, Jing Bai, Jing Chen, et al. 2023. “CellMarker  
974 2.0: An Updated Database of Manually Curated Cell Markers in Human/Mouse and Web Tools  
975 Based on ScRNA-Seq Data.” *Nucleic Acids Research* 51 (D1): D870–76.  
976 <https://doi.org/10.1093/NAR/GKAC947>.
- 977 Javaid, Nasir, and Sangdun Choi. 2020. “Toll-like Receptors from the Perspective of Cancer  
978 Treatment.” *Cancers* 12 (2): 297. <https://doi.org/10.3390/CANCERS12020297>.
- 979 Jiang, Yijia, Zhirui Hu, Junchen Jiang, Alexander Zhu, Yi Zhang, Allen W. Lynch, Yingtian Xie, et al.  
980 2023. “ScATAnno: Automated Cell Type Annotation for Single-Cell ATAC Sequencing Data.”  
981 *BioRxiv*, June. <https://doi.org/10.1101/2023.06.01.543296>.
- 982 Jimenez-Sanchez, Alejandro, Oliver Cast, and Martin L. Miller. 2019. “Comprehensive Benchmarking  
983 and Integration of Tumor Microenvironment Cell Estimation Methods.” *Cancer Research* 79  
984 (24): 6238–46. <https://doi.org/10.1158/0008-5472.CAN-18-3560>.
- 985 Jin, Haijing, and Zhandong Liu. 2021. “A Benchmark for RNA-Seq Deconvolution Analysis under  
986 Dynamic Testing Environments.” *Genome Biology* 22 (April): 102.  
987 <https://doi.org/10.1186/s13059-021-02290-6>.
- 988 Kalafati, Lydia, Ioannis Kourtzelis, Jonas Schulte-Schrepping, Xiaofei Li, Aikaterini Hatzioannou,  
989 Tatyana Grinenko, Eman Hagag, et al. 2020. “Innate Immune Training of Granulopoiesis  
990 Promotes Anti-Tumor Activity.” *Cell* 183 (3): 771-785.e12.  
991 <https://doi.org/10.1016/J.CELL.2020.09.058>.

- 992 Klemm, Sandy L., Zohar Shipony, and William J. Greenleaf. 2019. "Chromatin Accessibility and the  
993 Regulatory Epigenome." *Nature Reviews Genetics* 20 (4): 207–20.  
994 <https://doi.org/10.1038/s41576-018-0089-8>.
- 995 Kuhn, Max. 2008. "Building Predictive Models in R Using the Caret Package." *Journal of Statistical  
996 Software* 28 (5): 1–26. <https://doi.org/10.18637/JSS.V028.I05>.
- 997 Kumegawa, Kohei. 2023. "ATAC-Seq Data of 42 BC Samples as SummarizedExperiment Object with  
998 Count Matrix, Normalized Count Matrix, Peak Info, and Clinical Info." 2023.  
999 <https://doi.org/10.6084/m9.figshare.21992609.v1>.
- 1000 Kumegawa, Kohei, Sumito Saeki, Yoko Takahashi, Liying Yang, Tomo Osako, Tomoyoshi Nakadai,  
1001 Sayuri Amino, et al. 2023. "Chromatin Profile-Based Identification of a Novel ER-Positive Breast  
1002 Cancer Subgroup with Reduced ER-Responsive Element Accessibility." *British Journal of Cancer*  
1003 128 (7): 1208–22. <https://doi.org/10.1038/s41416-023-02178-1>.
- 1004 Lareau, Caleb A., Fabiana M. Duarte, Jennifer G. Chew, Vinay K. Kartha, Zach D. Burkett, Andrew S.  
1005 Kohlway, Dmitry Pokholok, et al. 2019. "Droplet-Based Combinatorial Indexing for Massive-  
1006 Scale Single-Cell Chromatin Accessibility." *Nature Biotechnology* 37 (8): 916–24.  
1007 <https://doi.org/10.1038/s41587-019-0147-6>.
- 1008 Lau, Jessica W., Erik Lehnert, Anurag Sethi, Raunaq Malhotra, Gaurav Kaushik, Zeynep Onder, Nick  
1009 Groves-Kirkby, et al. 2017. "The Cancer Genomics Cloud: Collaborative, Reproducible, and  
1010 Democratized - A New Paradigm in Large-Scale Computational Research." *Cancer Research* 77  
1011 (21): e3–6. <https://doi.org/10.1158/0008-5472.CAN-17-0387>.
- 1012 Law, Charity W., Yunshun Chen, Wei Shi, and Gordon K. Smyth. 2014. "Voom: Precision Weights  
1013 Unlock Linear Model Analysis Tools for RNA-Seq Read Counts." *Genome Biology* 15 (February):  
1014 R29. <https://doi.org/10.1186/GB-2014-15-2-R29/FIGURES/11>.
- 1015 Leylek, Rebecca, Marcela Alcántara-Hernández, Jeffrey M. Granja, Michael Chavez, Kimberly Perez,  
1016 Oscar R. Diaz, Rui Li, Ansuman T. Satpathy, Howard Y. Chang, and Juliana Idoyaga. 2020.  
1017 "Chromatin Landscape Underpinning Human Dendritic Cell Heterogeneity." *Cell Reports* 32 (12):



- 1018 108180. <https://doi.org/10.1016/J.CELREP.2020.108180>.
- 1019 Li, Huamei, Amit Sharma, Kun Luo, Zhaohui S. Qin, Xiao Sun, and Hongde Liu. 2020. “DeconPeaker, a  
1020 Deconvolution Model to Identify Cell Types Based on Chromatin Accessibility in ATAC-Seq Data  
1021 of Mixture Samples.” *Frontiers in Genetics* 11 (June).  
1022 <https://doi.org/10.3389/fgene.2020.00392>.
- 1023 Li, Taiwen, Jingxin Fu, Zexian Zeng, David Cohen, Jing Li, Qianming Chen, Bo Li, and X. Shirley Liu.  
1024 2020. “TIMER2.0 for Analysis of Tumor-Infiltrating Immune Cells.” *Nucleic Acids Research* 48  
1025 (May): W509–14. <https://doi.org/10.1093/nar/gkaa407>.
- 1026 Liao, Yang, Gordon K. Smyth, and Wei Shi. 2014. “FeatureCounts: An Efficient General Purpose  
1027 Program for Assigning Sequence Reads to Genomic Features.” *Bioinformatics* 30 (7): 923–30.  
1028 <https://doi.org/10.1093/BIOINFORMATICS/BTT656>.
- 1029 Liu, Qian, Lisa Zaba, Ansuman T. Satpathy, Michelle Longmire, Wen Zhang, Kun Li, Jeffrey Granja, et  
1030 al. 2020. “Chromatin Accessibility Landscapes of Skin Cells in Systemic Sclerosis Nominate  
1031 Dendritic Cells in Disease Pathogenesis.” *Nature Communications* 11 (1): 5843.  
1032 <https://doi.org/10.1038/s41467-020-19702-z>.
- 1033 Luo, Liheng, Michael Gribskov, and Sufang Wang. 2022. “Bibliometric Review of ATAC-Seq and Its  
1034 Application in Gene Expression.” *Briefings in Bioinformatics*, March.  
1035 <https://doi.org/10.1093/BIB/BBAC061>.
- 1036 Machlab, Dania, Lukas Burger, Charlotte Soneson, Filippo M. Rijli, Dirk Schübeler, and Michael B.  
1037 Stadler. 2022. “MonaLisa: An R/Bioconductor Package for Identifying Regulatory Motifs.”  
1038 *Bioinformatics* 38 (9): 2624–25. <https://doi.org/10.1093/BIOINFORMATICS/BTAC102>.
- 1039 Mayer, Michael. 2023. “R Package ‘SplitTools’: Tools for Data Splitting. R Package Version 1.0.1.  
1040 <https://cran.r-project.org/web/packages/SplitTools/index.html>.”
- 1041 Monaco, Gianni, Bernett Lee, Weili Xu, Seri Mustafah, You Yi Hwang, Christophe Carré, Nicolas  
1042 Burdin, et al. 2019. “RNA-Seq Signatures Normalized by mRNA Abundance Allow Absolute  
1043 Deconvolution of Human Immune Cell Types.” *Cell Reports* 26 (6): 1627-1640.e7.

- 1044 <https://doi.org/10.1016/J.CELREP.2019.01.041>.
- 1045 Mumbach, Maxwell R., Ansuman T. Satpathy, Evan A. Boyle, Chao Dai, Benjamin G. Gowen, Seung  
1046 Woo Cho, Michelle L. Nguyen, et al. 2017. "Enhancer Connectome in Primary Human Cells  
1047 Identifies Target Genes of Disease-Associated DNA Elements." *Nature Genetics* 49 (11): 1602–  
1048 12. <https://doi.org/10.1038/ng.3963>.
- 1049 Newman, Aaron M., Chih Long Liu, Michael R. Green, Andrew J. Gentles, Weiguo Feng, Yue Xu,  
1050 Chuong D. Hoang, Maximilian Diehn, and Ash A. Alizadeh. 2015. "Robust Enumeration of Cell  
1051 Subsets from Tissue Expression Profiles." *Nature Methods* 12 (5): 453–57.  
1052 <https://doi.org/10.1038/nmeth.3337>.
- 1053 Newman, Aaron M., Chloé B. Steen, Chih Long Liu, Andrew J. Gentles, Aadel A. Chaudhuri, Florian  
1054 Scherer, Michael S. Khodadoust, et al. 2019. "Determining Cell Type Abundance and Expression  
1055 from Bulk Tissues with Digital Cytometry." *Nature Biotechnology* 37 (7): 773–82.  
1056 <https://doi.org/10.1038/s41587-019-0114-2>.
- 1057 Peng, Xianlu Laura, Richard A. Moffitt, Robert J. Torphy, Keith E. Volmar, and Jen Jen Yeh. 2019. "De  
1058 Novo Compartment Deconvolution and Weight Estimation of Tumor Samples Using DECODER."  
1059 *Nature Communications* 10 (1): 4729. <https://doi.org/10.1038/s41467-019-12517-7>.
- 1060 Perez, Cristina, Cirino Botta, Aintzane Zabaleta, Noemi Puig, Maria-Teresa Cedena, Ibai Goicoechea,  
1061 Daniel Alameda, et al. 2020. "Immunogenomic Identification and Characterization of  
1062 Granulocytic Myeloid-Derived Suppressor Cells in Multiple Myeloma." *Blood* 136 (2): 199–209.  
1063 <https://doi.org/10.1182/BLOOD.2019004537>.
- 1064 Qiu, Yixuan, Jiebiao Wang, Jing Lei, and Kathryn Roeder. 2021. "Identification of Cell-Type-Specific  
1065 Marker Genes from Co-Expression Patterns in Tissue Samples." *Bioinformatics* 37 (19): 3228–34.  
1066 <https://doi.org/10.1093/BIOINFORMATICS/BTAB257>.
- 1067 Racle, Julien, and David Gfeller. 2020. "EPIC: A Tool to Estimate the Proportions of Different Cell  
1068 Types from Bulk Gene Expression Data." In *Methods in Molecular Biology*, 2120:233–48.  
1069 Humana Press Inc. [https://doi.org/10.1007/978-1-0716-0327-7\\_17](https://doi.org/10.1007/978-1-0716-0327-7_17).

- 1070 Racle, Julien, Kaat de Jonge, Petra Baumgaertner, Daniel E. Speiser, and David Gfeller. 2017.  
1071 “Simultaneous Enumeration of Cancer and Immune Cell Types from Bulk Tumor Gene  
1072 Expression Data.” *ELife* 6 (November). <https://doi.org/10.7554/eLife.26476>.
- 1073 Ram-Mohan, Nikhil, Simone A Thair, Ulrike M Litzengerger, Steven Cogill, Nadya Andini, Xi Yang,  
1074 Howard Y Chang, and Samuel Yang. 2021. “Profiling Chromatin Accessibility Responses in  
1075 Human Neutrophils with Sensitive Pathogen Detection.” *Life Science Alliance* 4 (8).  
1076 <https://doi.org/10.26508/LSA.202000976>.
- 1077 Regner, Matthew J., Kamila Wisniewska, Susana Garcia-Recio, Aatish Thennavan, Raul Mendez-  
1078 Giraldez, Venkat S. Malladi, Gabrielle Hawkins, et al. 2021. “A Multi-Omic Single-Cell Landscape  
1079 of Human Gynecologic Malignancies.” *Molecular Cell* 81 (23): 4924-4941.e10.  
1080 <https://doi.org/10.1016/j.molcel.2021.10.013>.
- 1081 Risso, Davide, Katja Schwartz, Gavin Sherlock, and Sandrine Dudoit. 2011. “GC-Content Normalization  
1082 for RNA-Seq Data.” *BMC Bioinformatics* 12 (December): 480. [https://doi.org/10.1186/1471-  
1083 2105-12-480/FIGURES/7](https://doi.org/10.1186/1471-2105-12-480/FIGURES/7).
- 1084 Ritchie, Matthew E., Belinda Phipson, Di Wu, Yifang Hu, Charity W. Law, Wei Shi, and Gordon K.  
1085 Smyth. 2015. “Limma Powers Differential Expression Analyses for RNA-Sequencing and  
1086 Microarray Studies.” *Nucleic Acids Research* 43 (7): e47. <https://doi.org/10.1093/nar/gkv007>.
- 1087 Robinson, Mark D., Davis J. McCarthy, and Gordon K. Smyth. 2010. “EdgeR: A Bioconductor Package  
1088 for Differential Expression Analysis of Digital Gene Expression Data.” *Bioinformatics* 26 (1): 139–  
1089 40. <https://doi.org/10.1093/BIOINFORMATICS/BTP616>.
- 1090 Rozowsky, Joel, Jiahao Gao, Beatrice Borsari, Roderic Guigó, Thomas R Gingeras, Mark Gerstein,  
1091 Yucheng T Yang, et al. 2023. “The EN-TEEx Resource of Multi-Tissue Personal Epigenomes &  
1092 Variant-Impact Models.” *Cell* 186 (7): 1493-1511.e40.  
1093 <https://doi.org/10.1016/j.cell.2023.02.018>.
- 1094 Sanseviero, Emilio. 2019. “NK Cell-Fc Receptors Advance Tumor Immunotherapy.” *Journal of Clinical  
1095 Medicine* 8 (10): 1667. <https://doi.org/10.3390/JCM8101667>.

- 1096 Satpathy, Ansuman T., Jeffrey M. Granja, Kathryn E. Yost, Yanyan Qi, Francesca Meschi, Geoffrey P.  
1097 McDermott, Brett N. Olsen, et al. 2019. “Massively Parallel Single-Cell Chromatin Landscapes of  
1098 Human Immune Cell Development and Intratumoral T Cell Exhaustion.” *Nature Biotechnology*  
1099 37 (8): 925–36. <https://doi.org/10.1038/s41587-019-0206-z>.
- 1100 Smith, Jason P, M Ryan Corces, Jin Xu, Vincent P Reuter, Howard Y Chang, and Nathan C Sheffield.  
1101 2021. “PEPATAC: An Optimized Pipeline for ATAC-Seq Data Analysis with Serial Alignments.”  
1102 *NAR Genomics and Bioinformatics* 3 (4). <https://doi.org/10.1093/NARGAB/LQAB101>.
- 1103 Stuart, Tim, Avi Srivastava, Shaista Madad, Caleb A. Lareau, and Rahul Satija. 2021. “Single-Cell  
1104 Chromatin State Analysis with Signac.” *Nature Methods* 18 (November): 1333–41.  
1105 <https://doi.org/10.1038/s41592-021-01282-5>.
- 1106 Sturm, Gregor, Francesca Finotello, Florent Petitprez, Jitao David Zhang, Jan Baumbach, Wolf H  
1107 Fridman, Markus List, and Tatsiana Aneichyk. 2019. “Comprehensive Evaluation of  
1108 Transcriptome-Based Cell-Type Quantification Methods for Immuno-Oncology.” *Bioinformatics*  
1109 35 (14): i436–45. <https://doi.org/10.1093/bioinformatics/btz363>.
- 1110 Subramanian, Aravind, Pablo Tamayo, Vamsi K Mootha, Sayan Mukherjee, Benjamin L Ebert, Michael  
1111 A Gillette, Amanda Paulovich, et al. 2005. “Gene Set Enrichment Analysis: A Knowledge-Based  
1112 Approach for Interpreting Genome-Wide Expression Profiles.” *PNAS* 102 (43): 15545–50.  
1113 <https://doi.org/10.1073/pnas.0506580102>.
- 1114 Teschendorff, Andrew E., Tianyu Zhu, Charles E. Breeze, and Stephan Beck. 2020. “EPISCORE: Cell  
1115 Type Deconvolution of Bulk Tissue DNA Methylomes from Single-Cell RNA-Seq Data.” *Genome*  
1116 *Biology* 21 (September). <https://doi.org/10.1186/s13059-020-02126-9>.
- 1117 The ENCODE Project Consortium, Jill E. Moore, Michael J. Purcaro, Henry E. Pratt, Charles B. Epstein,  
1118 Noam Shores, and Jessika Adrian. 2020. “Expanded Encyclopaedias of DNA Elements in the  
1119 Human and Mouse Genomes.” *Nature* 583 (July): 699–710. [https://doi.org/10.1038/s41586-](https://doi.org/10.1038/s41586-020-2493-4)  
1120 [020-2493-4](https://doi.org/10.1038/s41586-020-2493-4).
- 1121 Trizzino, Marco, Avery Zucco, Sandra Deliard, Fang Wang, Elisa Barbieri, Filippo Veglia, Dmitry

- 1122 Gabrilovich, and Alessandro Gardini. 2021. "EGR1 Is a Gatekeeper of Inflammatory Enhancers in  
1123 Human Macrophages." *Science Advances* 7 (3).  
1124 [https://doi.org/10.1126/SCIADV.AAZ8836/SUPPL\\_FILE/AAZ8836\\_TABLE\\_S7.XLSX](https://doi.org/10.1126/SCIADV.AAZ8836/SUPPL_FILE/AAZ8836_TABLE_S7.XLSX).
- 1125 Ucar, Duygu, Eladio J. Márquez, Cheng Han Chung, Radu Marches, Robert J. Rossi, Asli Uyar, Te Chia  
1126 Wu, et al. 2017. "The Chromatin Accessibility Signature of Human Immune Aging Stems from  
1127 CD8+ T Cells." *Journal of Experimental Medicine* 214 (10): 3123–44.  
1128 <https://doi.org/10.1084/jem.20170416>.
- 1129 Visser, Karin E. de, and Johanna A. Joyce. 2023. "The Evolving Tumor Microenvironment: From  
1130 Cancer Initiation to Metastatic Outgrowth." *Cancer Cell* 41 (3): 374–403.  
1131 <https://doi.org/10.1016/J.CCELL.2023.02.016>.
- 1132 Watt, Stephen, Louella Vasquez, Klaudia Walter, Alice L. Mann, Kousik Kundu, Lu Chen, Ying Sims, et  
1133 al. 2021. "Genetic Perturbation of PU.1 Binding and Chromatin Looping at Neutrophil Enhancers  
1134 Associates with Autoimmune Disease." *Nature Communications* 12 (April): 2298.  
1135 <https://doi.org/10.1038/S41467-021-22548-8>.
- 1136 Welch, Ryan P., Chee Lee, Paul M. Imbriano, Snehal Patil, Terry E. Weymouth, R. Alex Smith, Laura J.  
1137 Scott, and Maureen A. Sartor. 2014. "ChIP-Enrich: Gene Set Enrichment Testing for ChIP-Seq  
1138 Data." *Nucleic Acids Research* 42 (13): e105. <https://doi.org/10.1093/NAR/GKU463>.
- 1139 Xin, Jingxue, Hui Zhang, Yaoxi He, Zhana Duren, Caijuan Bai, Lang Chen, Xin Luo, et al. 2020.  
1140 "Chromatin Accessibility Landscape and Regulatory Network of High-Altitude Hypoxia  
1141 Adaptation." *Nature Communications* 11 (1): 4928. [https://doi.org/10.1038/S41467-020-18638-](https://doi.org/10.1038/S41467-020-18638-8)  
1142 8.
- 1143 Yu, Guangchuang, Li Gen Wang, and Qing Yu He. 2015. "ChIPseeker: An R/Bioconductor Package for  
1144 ChIP Peak Annotation, Comparison and Visualization." *Bioinformatics* 31 (14): 2382–83.  
1145 <https://doi.org/10.1093/BIOINFORMATICS/BTV145>.
- 1146 Zeng, Wanwen, Xi Chen, Zhana Duren, Yong Wang, Rui Jiang, and Wing Hung Wong. 2019. "DC3 Is a  
1147 Method for Deconvolution and Coupled Clustering from Bulk and Single-Cell Genomics Data."

- 1148 *Nature Communications* 10 (October): 4613. <https://doi.org/10.1038/s41467-019-12547-1>.
- 1149 Zhang, Hanyu, Ruoyi Cai, James Dai, and Wei Sun. 2021. "EMeth: An EM Algorithm for Cell Type  
1150 Decomposition Based on DNA Methylation Data." *Scientific Reports* 11 (March): 5717.  
1151 <https://doi.org/10.1038/s41598-021-84864-9>.
- 1152 Zhang, Kai, James D Hocker, Michael Miller, Xiaomeng Hou, Joshua Chiou, Olivier B Poirion, Yunjiang  
1153 Qiu, et al. 2021. "A Single-Cell Atlas of Chromatin Accessibility in the Human Genome." *Cell* 184  
1154 (24): 5985-6001.e19. <https://doi.org/10.1016/j.cell.2021.10.024>.
- 1155 Zhang, Ping, Harindra E. Amarasinghe, Justin P. Whalley, Chwen Tay, Hai Fang, Gabriele Migliorini,  
1156 Andrew C. Brown, et al. 2022. "Epigenomic Analysis Reveals a Dynamic and Context-Specific  
1157 Macrophage Enhancer Landscape Associated with Innate Immune Activation and Tolerance."  
1158 *Genome Biology* 23 (1): 136. <https://doi.org/10.1186/S13059-022-02702-1>.
- 1159 Zhang, Yong, Tao Liu, Clifford A. Meyer, Jérôme Eeckhoute, David S. Johnson, Bradley E. Bernstein,  
1160 Chad Nussbaum, et al. 2008. "Model-Based Analysis of ChIP-Seq (MACS)." *Genome Biology* 9  
1161 (9): R137. <https://doi.org/10.1186/GB-2008-9-9-R137/FIGURES/3>.

1162

1163 **List of abbreviations:**

1164 **ATAC:** Assay for Transposase-Accessible chromatin

1165 **CBP(s):** chromatin binding protein(s)

1166 **ChIP-seq:** chromatin immunoprecipitation followed by sequencing

1167 **DC:** dendritic cells

1168 **NK:** natural killer cells

1169 **PCA:** principal component analysis

1170 **RMSE:** root mean squared error

1171 **TCGA :** The Cancer Genome Atlas

1172 **TF(s):** transcription factor(s)

1173 **TSS:** transcription start site

1174 **UMAP:** Uniform Manifold Approximation

1175

# Main Figures.

Figure 1

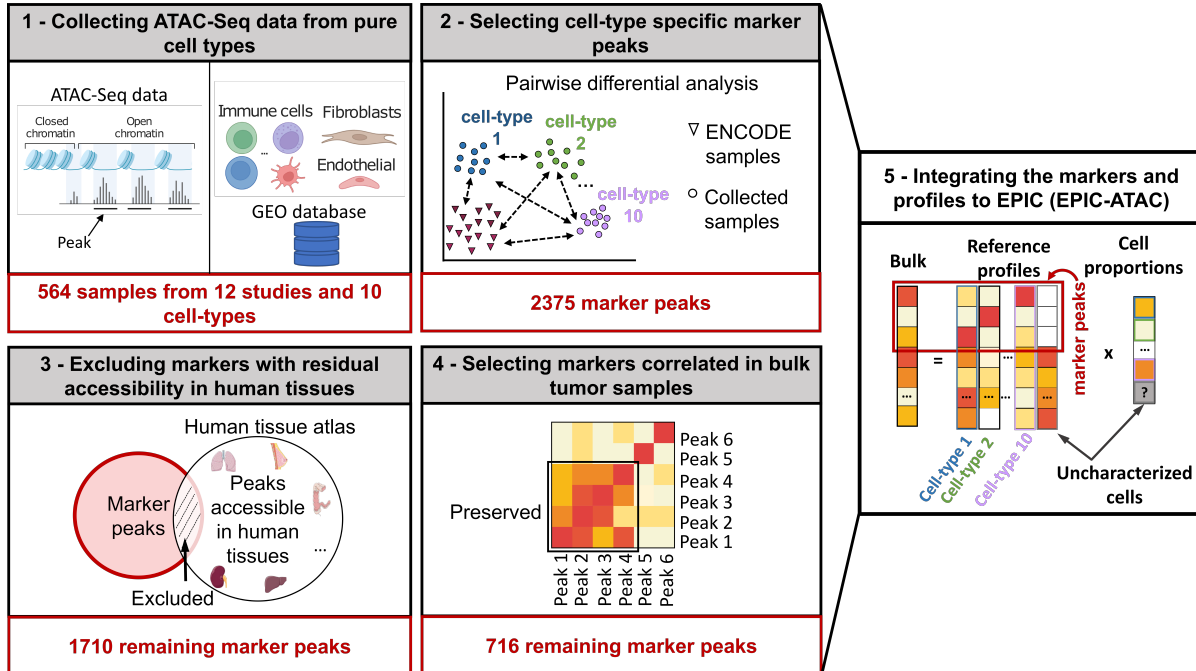



Figure 2

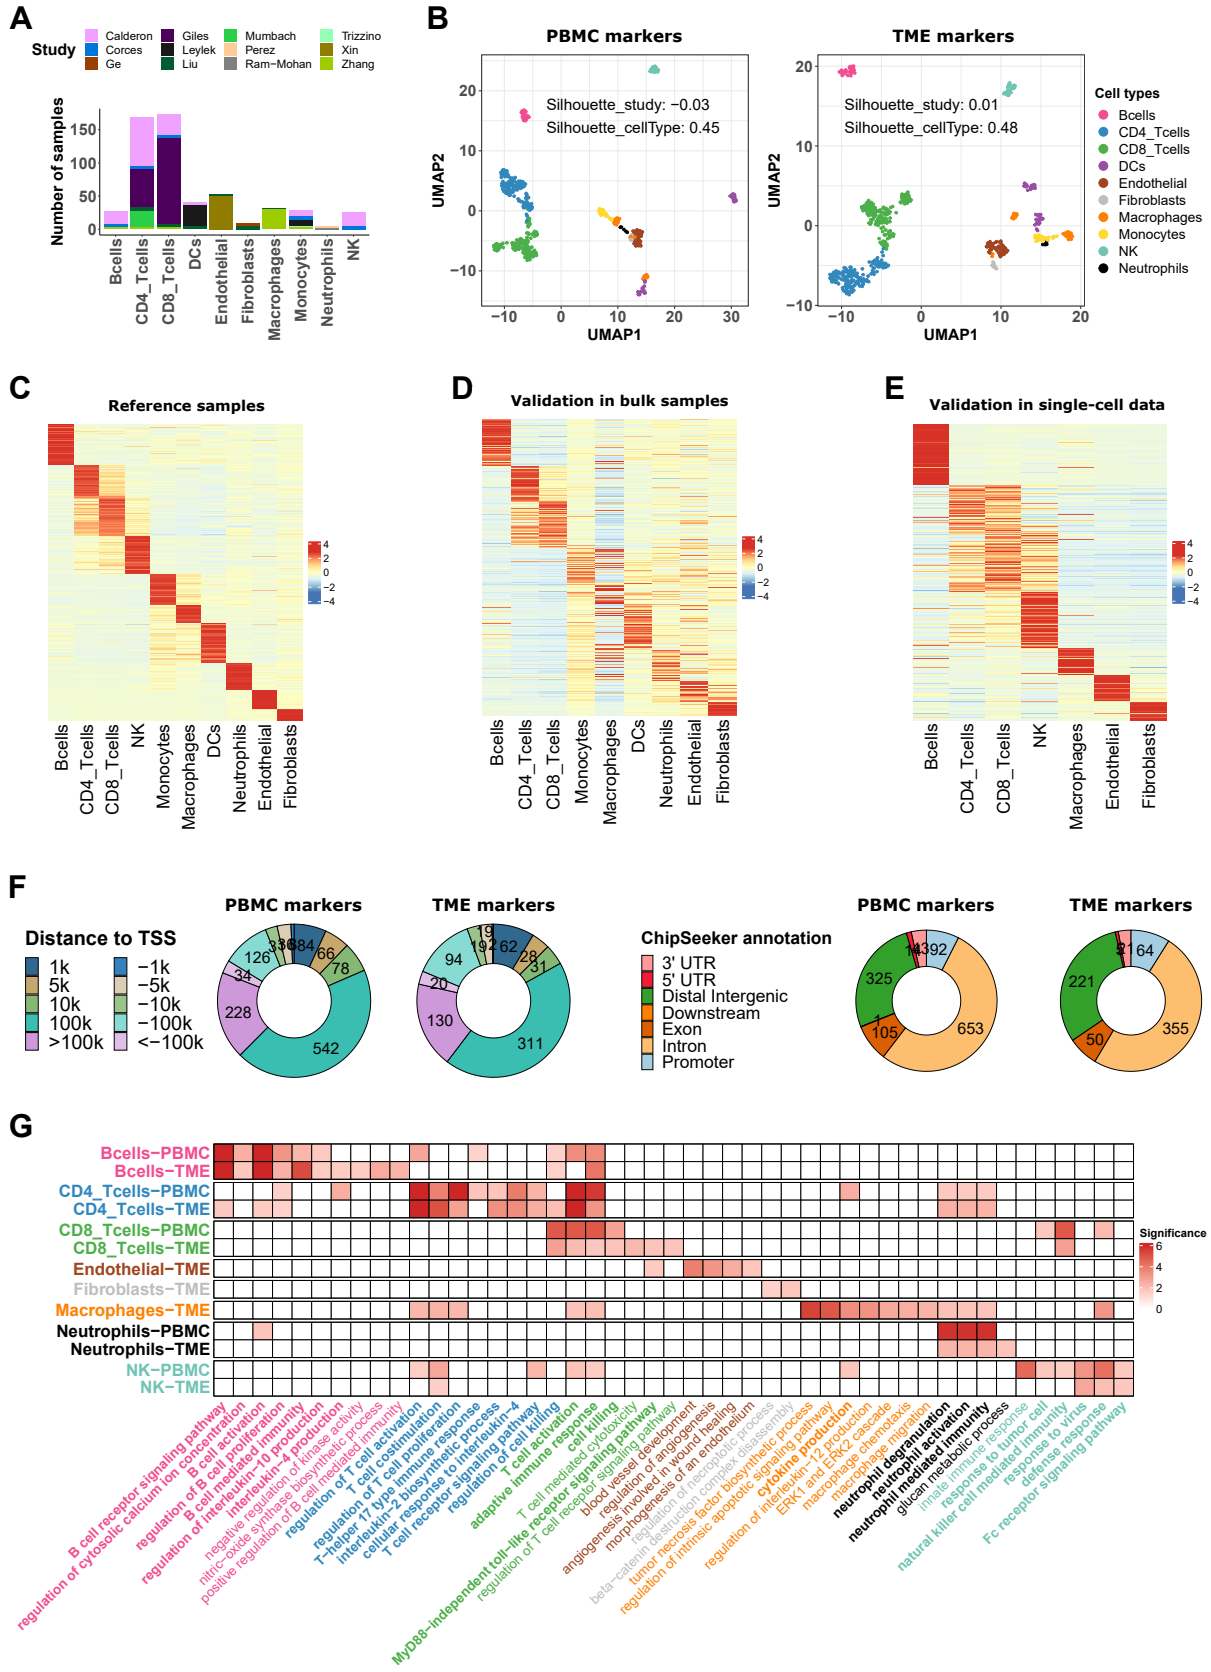

Figure 3

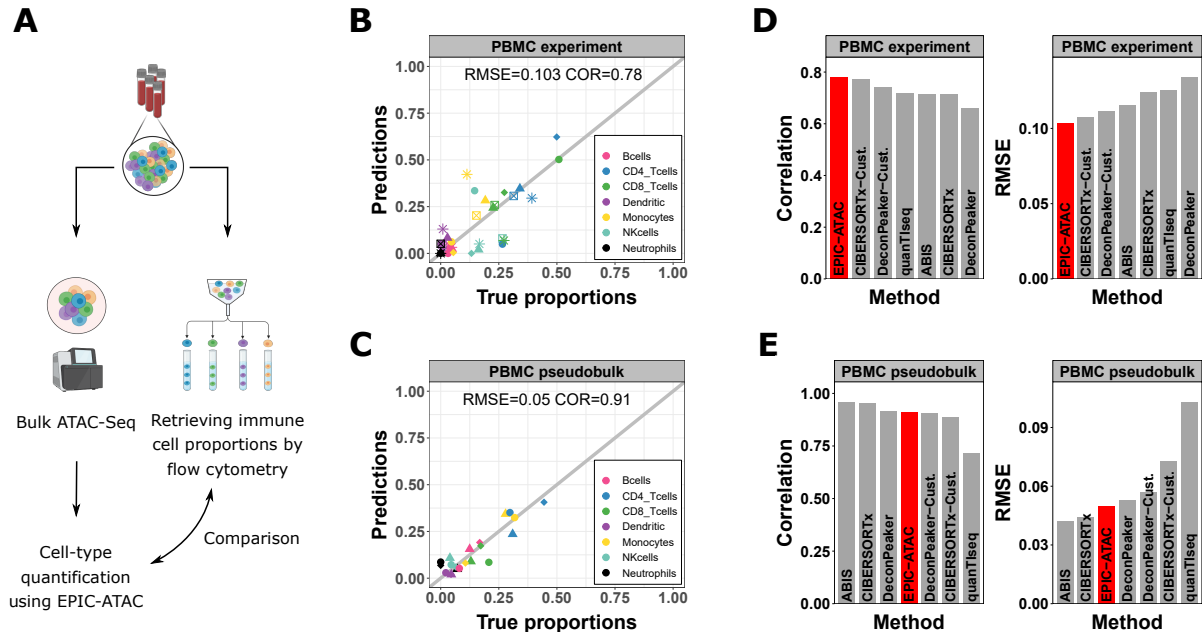

Figure 4

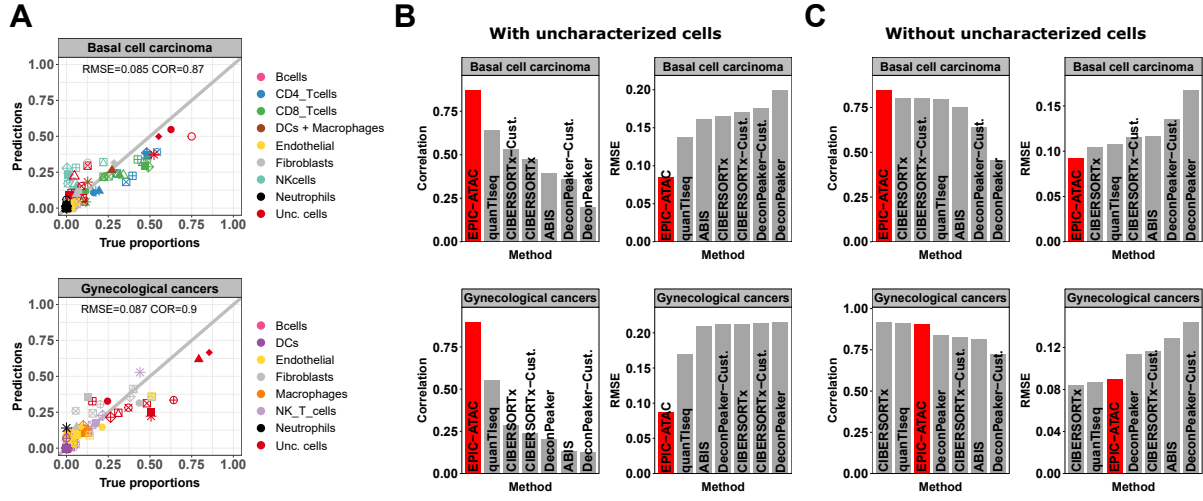

Figure 5

**A**

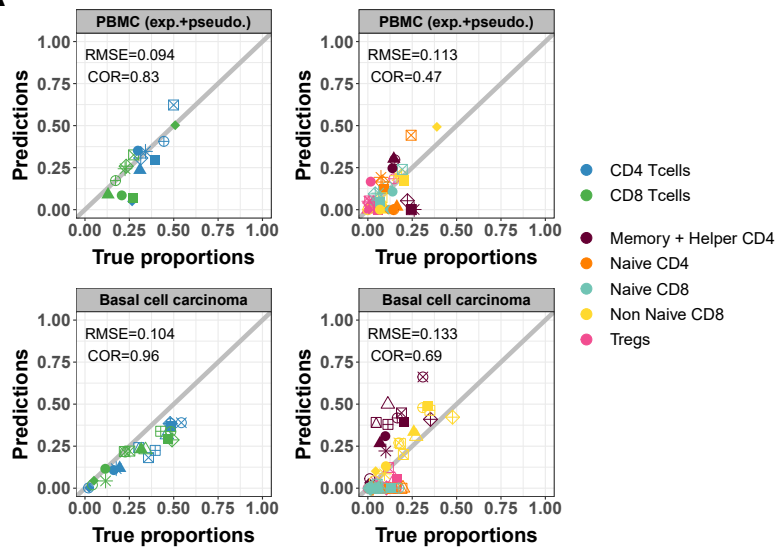

**B**

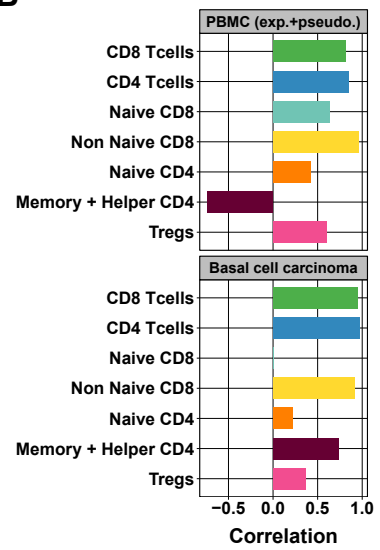

Figure 6

**A**

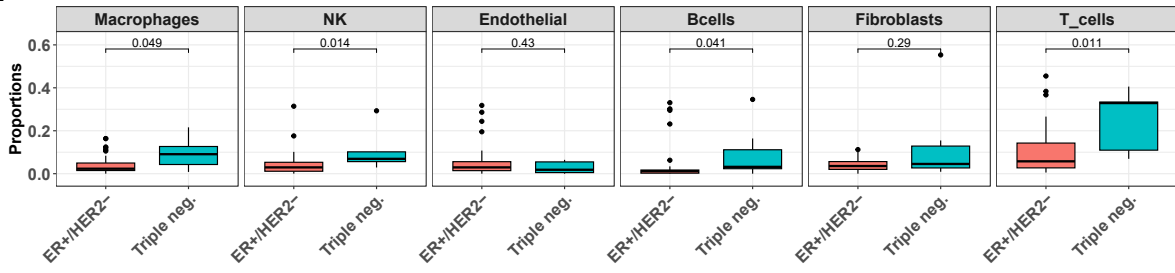

**B**

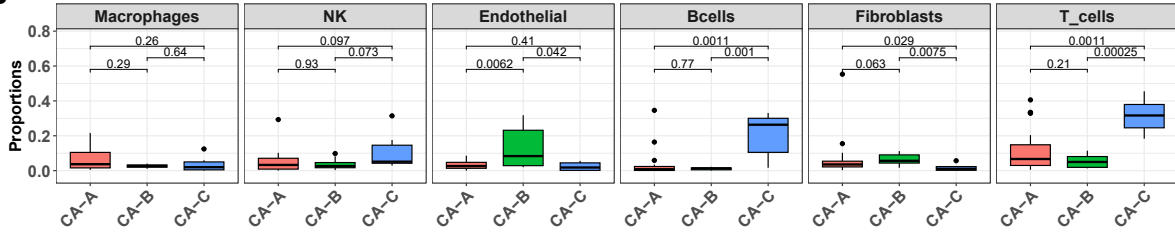

Figure 7

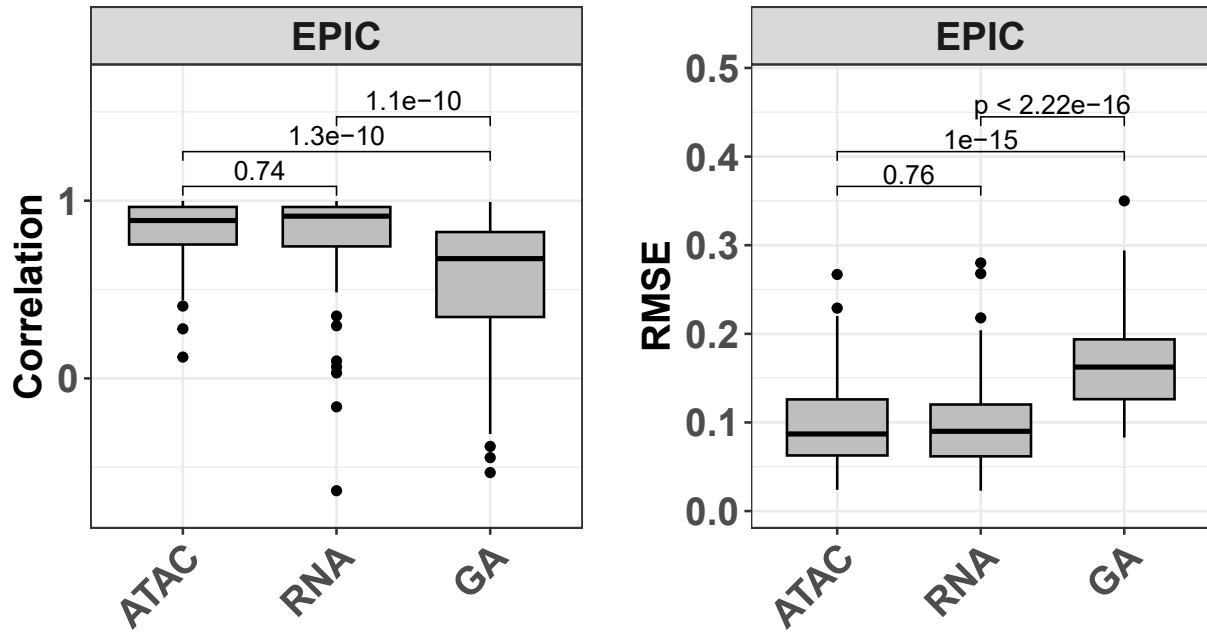

Source: https://www.biorxiv.org/content/10.1101/2023.10.11.561826.full.pdf
